# Supplementary material for: Prognostic value of immune cells in the tumor microenvironment of early-stage lung cancer: a meta-analysis
Source: PubMed Central journal article supplement (PMC6935257; doi:10.18632/oncotarget.27392), 2019-12-24
Supplement: oncotarget-10-7142-s001.pdf [file oncotarget-10-7142-s001.pdf]

## Prognostic value of immune cells in the tumor microenvironment of early-stage lung cancer: a meta-analysis

### SUPPLEMENTARY MATERIALS

**Supplementary Table 1: Reported unadjusted vs. adjusted survival estimates**

| Name              | Year        | Biomarker         | Survival Type | Unadjusted HR (95% CI)  | Adjusted HR (95% CI)    |
|-------------------|-------------|-------------------|---------------|-------------------------|-------------------------|
| O'Callaghan       | 2015        | CD3               | OS            | 0.70 (0.47–1.05)        | 0.65 (0.41–1.02)        |
| Sepesi            | 2017        | CD3               | OS            | 0.60 (0.32–1.12)        | 0.35 (0.11–1.09)        |
| <b>Sepesi</b>     | <b>2017</b> | <b>CD4</b>        | <b>OS</b>     | <b>0.49 (0.29–0.85)</b> | <b>0.35 (0.11–1.09)</b> |
| Matsubara         | 2019        | CD4               | OS            | 1.55 (1.03–2.37)        | 1.65 (1.07–2.55)        |
| O'Callaghan       | 2015        | CD8               | OS            | 0.44 (0.29–0.67)        | 0.48 (0.30–0.76)        |
| Yazdi             | 2016        | CD8               | OS            | 0.64 (0.40–1.04)        | 0.62 (0.38–1.01)        |
| <b>Ameratunga</b> | <b>2016</b> | <b>CD8</b>        | <b>DFS</b>    | <b>0.82 (0.64–1.04)</b> | <b>0.70 (0.50–0.97)</b> |
| <b>Teng</b>       | <b>2016</b> | <b>CD8</b>        | <b>OS</b>     | <b>0.51 (0.29–0.98)</b> | <b>0.54 (0.28–1.05)</b> |
| Teng              | 2016        | CD8               | DFS           | 0.39 (0.22–0.71)        | 0.22 (0.05–0.89)        |
| <b>Ye</b>         | <b>2017</b> | <b>CD8</b>        | <b>OS</b>     | <b>0.71 (0.52–0.99)</b> | <b>0.70 (0.44–1.10)</b> |
| Kinoshita         | 2017        | CD8               | DFS           | 2.92 (1.69–5.07)        | 2.01 (1.14–3.56)        |
| Sepesi            | 2017        | CD8               | OS            | 1.88 (0.82–3.34)        | 1.70 (0.40–7.45)        |
| Kinoshita         | 2016        | CD20              | DFS           | 0.53 (0.34–0.84)        | 0.51 (0.32–0.80)        |
| Villegas          | 2002        | CD57              | OS            | 0.43 (0.20–0.95)        | 0.40 (0.17–0.93)        |
| Sepesi            | 2017        | CD57              | OS            | 0.24 (0.03–1.70)        | 0.60 (0.05–6.51)        |
| Kojima            | 2002        | CD68              | OS            | 1.45 (0.71–2.97)        | 1.43 (0.66–3.09)        |
| <b>Sepesi</b>     | <b>2017</b> | <b>CD68</b>       | <b>OS</b>     | <b>0.35 (0.12–0.97)</b> | <b>0.79 (0.11–5.63)</b> |
| Cao               | 2019        | CD68              | OS            | 4.19 (1.90–9.27)        | 2.86 (1.13–7.26)        |
| Cao               | 2019        | CD68              | DFS           | 2.09 (1.26–3.46)        | 1.81 (1.09–3.02)        |
| <b>Hanagiri</b>   | <b>2013</b> | <b>FoxP3</b>      | <b>OS</b>     | <b>2.56 (1.28–5.10)</b> | <b>1.82 (0.90–3.69)</b> |
| Hanagiri          | 2014        | FoxP3             | OS            | 2.82 (1.00–7.93)        | 4.22 (1.11–5.56)        |
| O'Callaghan       | 2015        | FoxP3             | OS            | 4.86 (3.11–7.59)        | 3.91 (2.33–6.55)        |
| <b>Barua</b>      | <b>2018</b> | <b>FoxP3</b>      | <b>OS</b>     | <b>1.43 (0.63–3.21)</b> | <b>1.52 (1.11–2.07)</b> |
| <b>Kojima</b>     | <b>2002</b> | <b>Mast Cells</b> | <b>OS</b>     | <b>2.31 (1.09–4.89)</b> | <b>1.16 (0.51–2.67)</b> |
| <b>Pelosi</b>     | <b>2004</b> | <b>Mast Cells</b> | <b>OS</b>     | <b>2.30 (1.20–4.90)</b> | <b>1.70 (0.60–4.60)</b> |
| <b>Pelosi</b>     | <b>2004</b> | <b>Mast Cells</b> | <b>DFS</b>    | <b>2.30 (1.20–4.70)</b> | <b>1.50 (0.60–3.60)</b> |
| <b>Kojima</b>     | <b>2005</b> | <b>Mast Cells</b> | <b>OS</b>     | <b>2.04 (1.05–3.96)</b> | <b>1.15 (0.53–2.48)</b> |

**A****CD3+ T cells**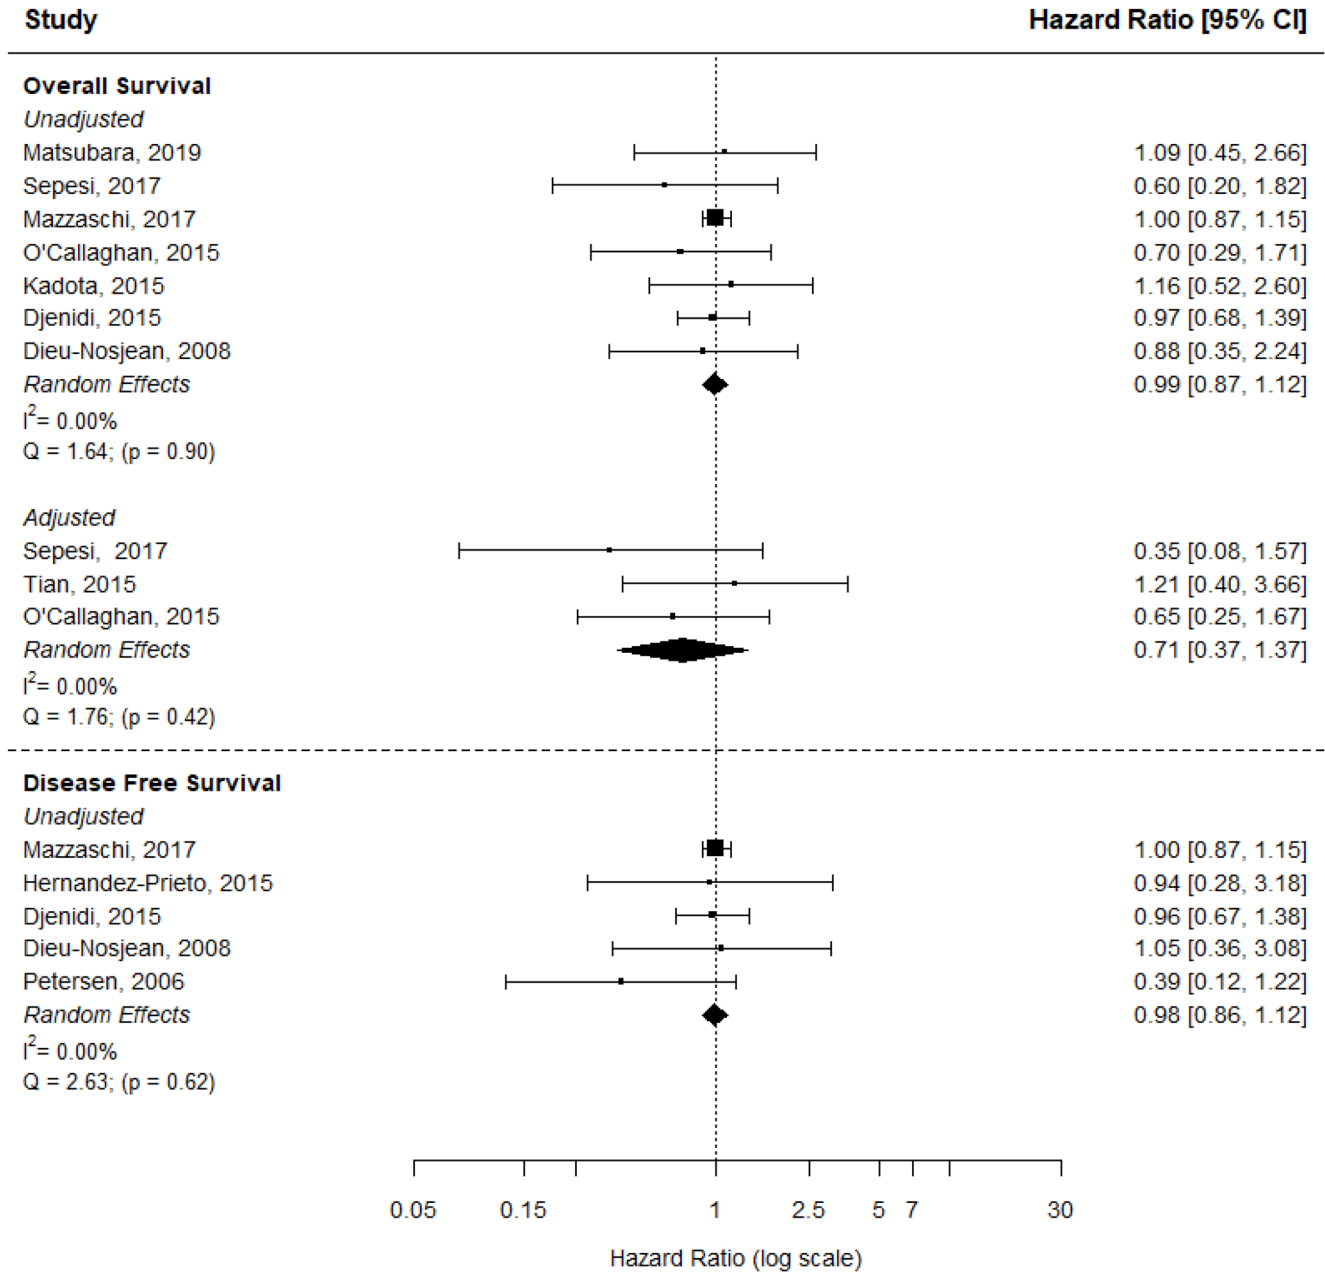

**B****CD3\_unadjusted\_OS**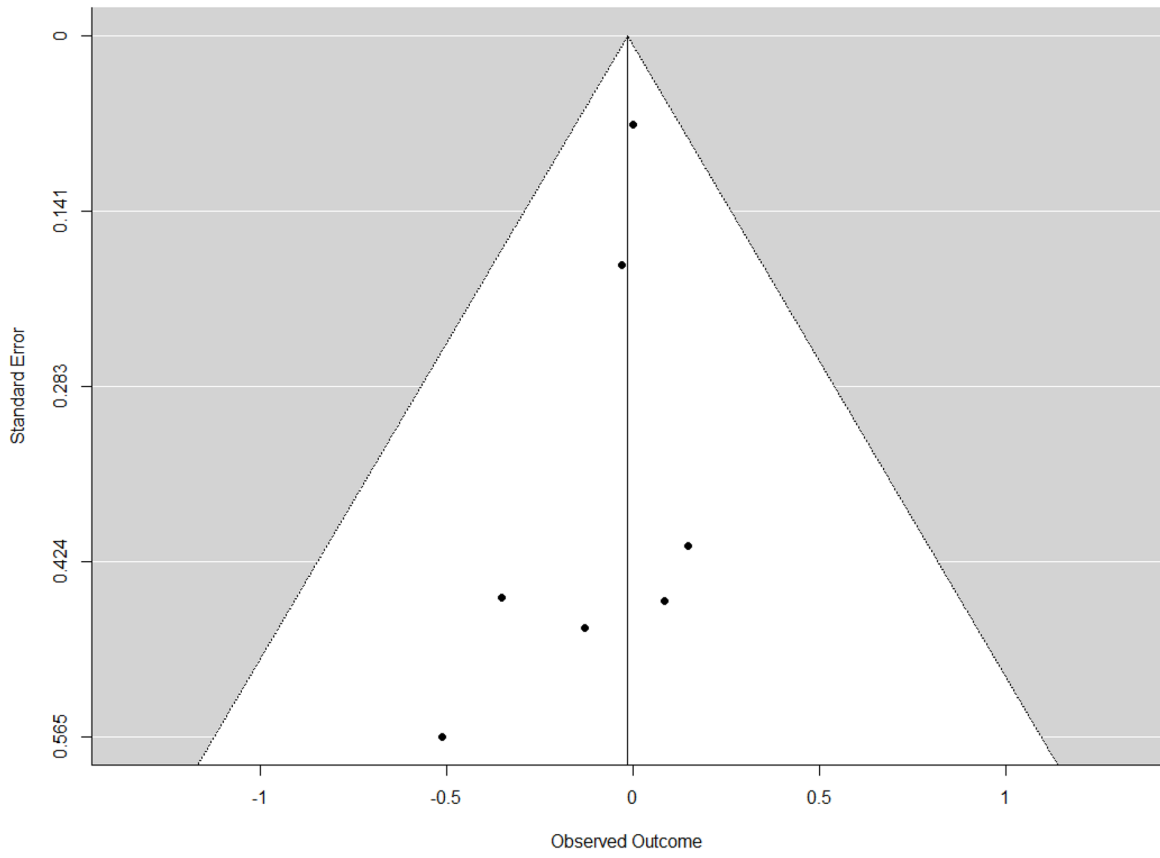**C****CD3\_adjusted\_OS**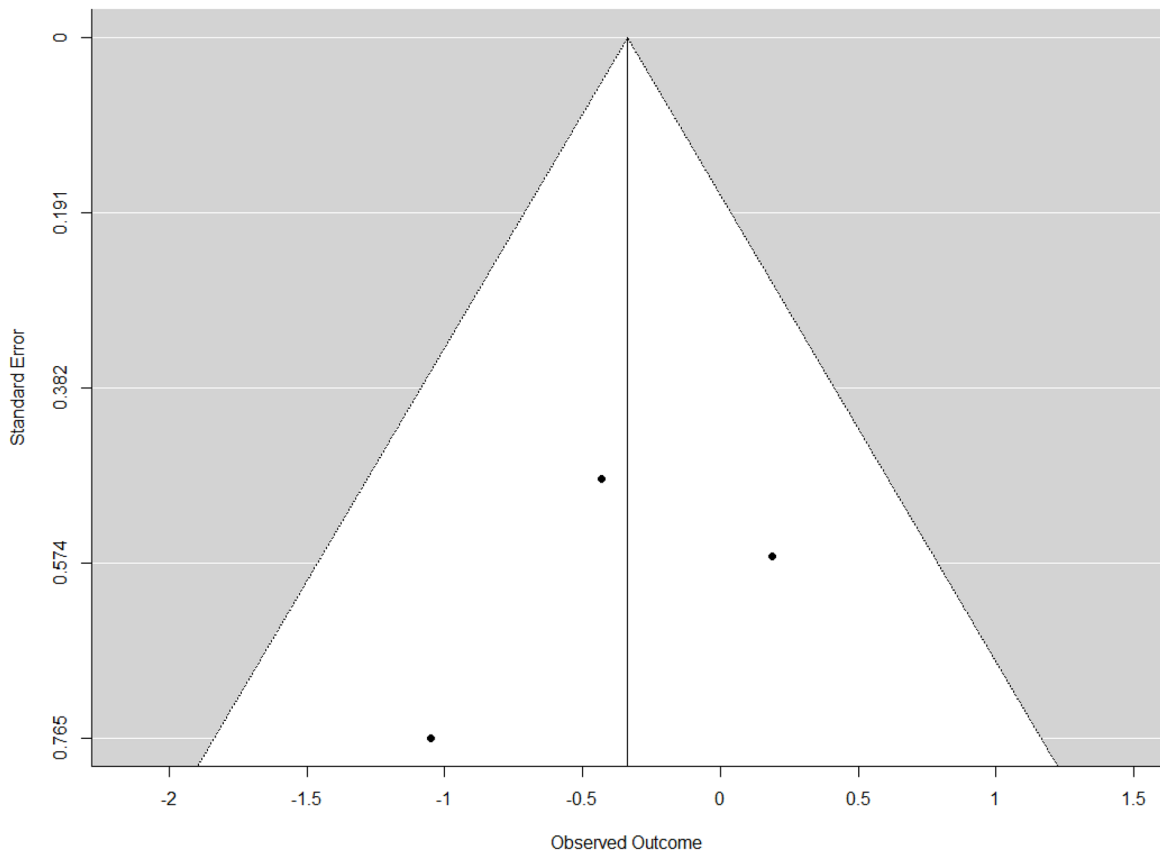

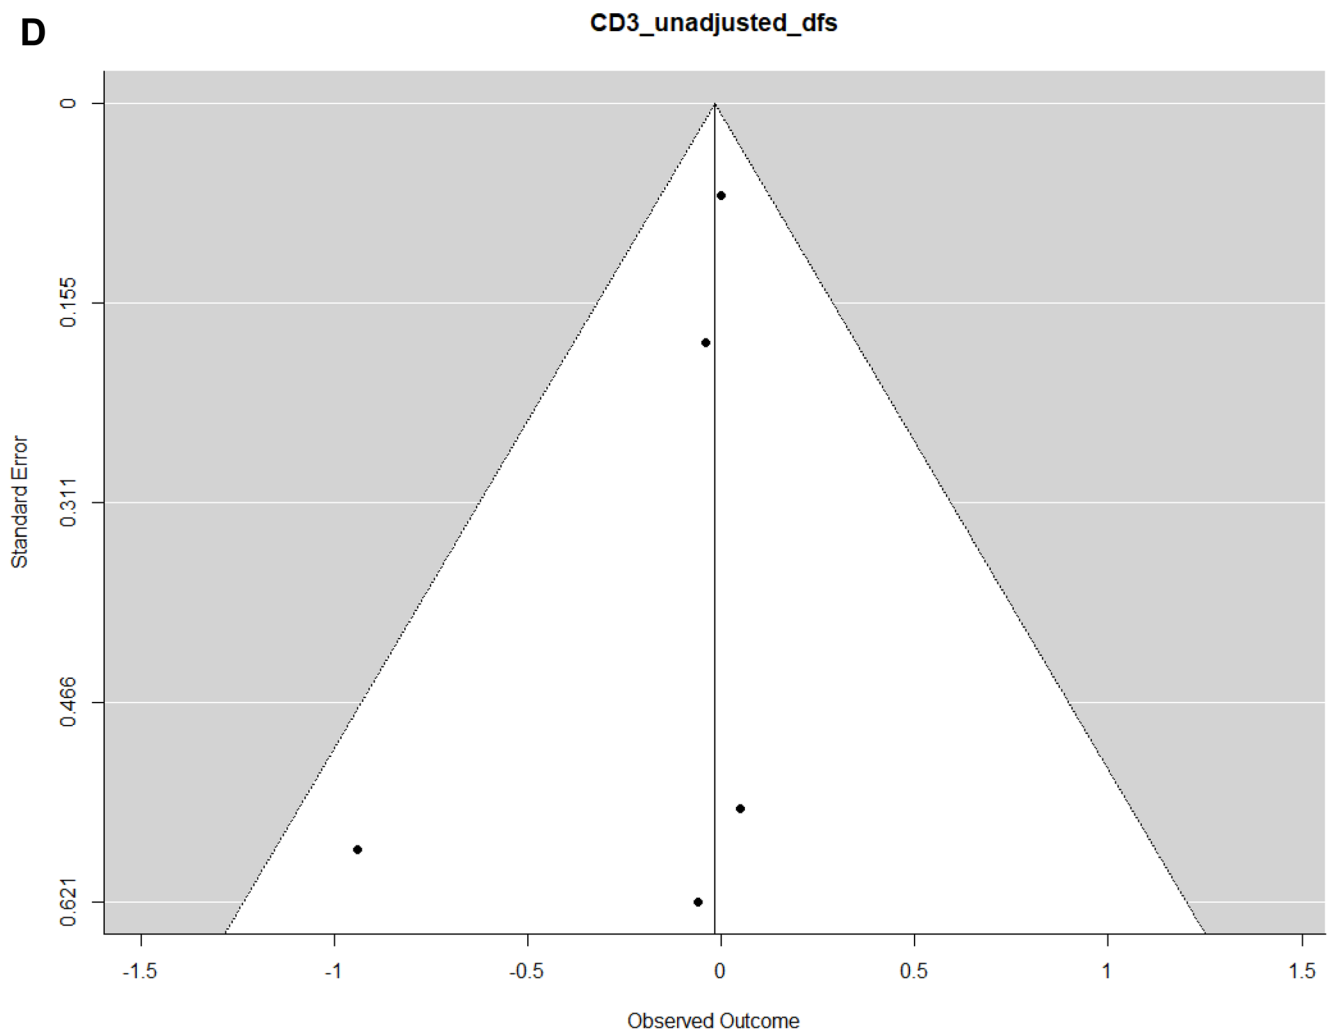

**Supplementary Figure 1:** (A) Forest Plot of CD3+T Cells. (B) Funnel Plot of CD3+T Cells Unadjusted OS Studies. (C) Funnel Plot of CD3+T Cells Adjusted OS Studies. (D) Funnel Plot of CD3+T Cells Unadjusted DFS Studies.

A

CD4+ T Helper cells

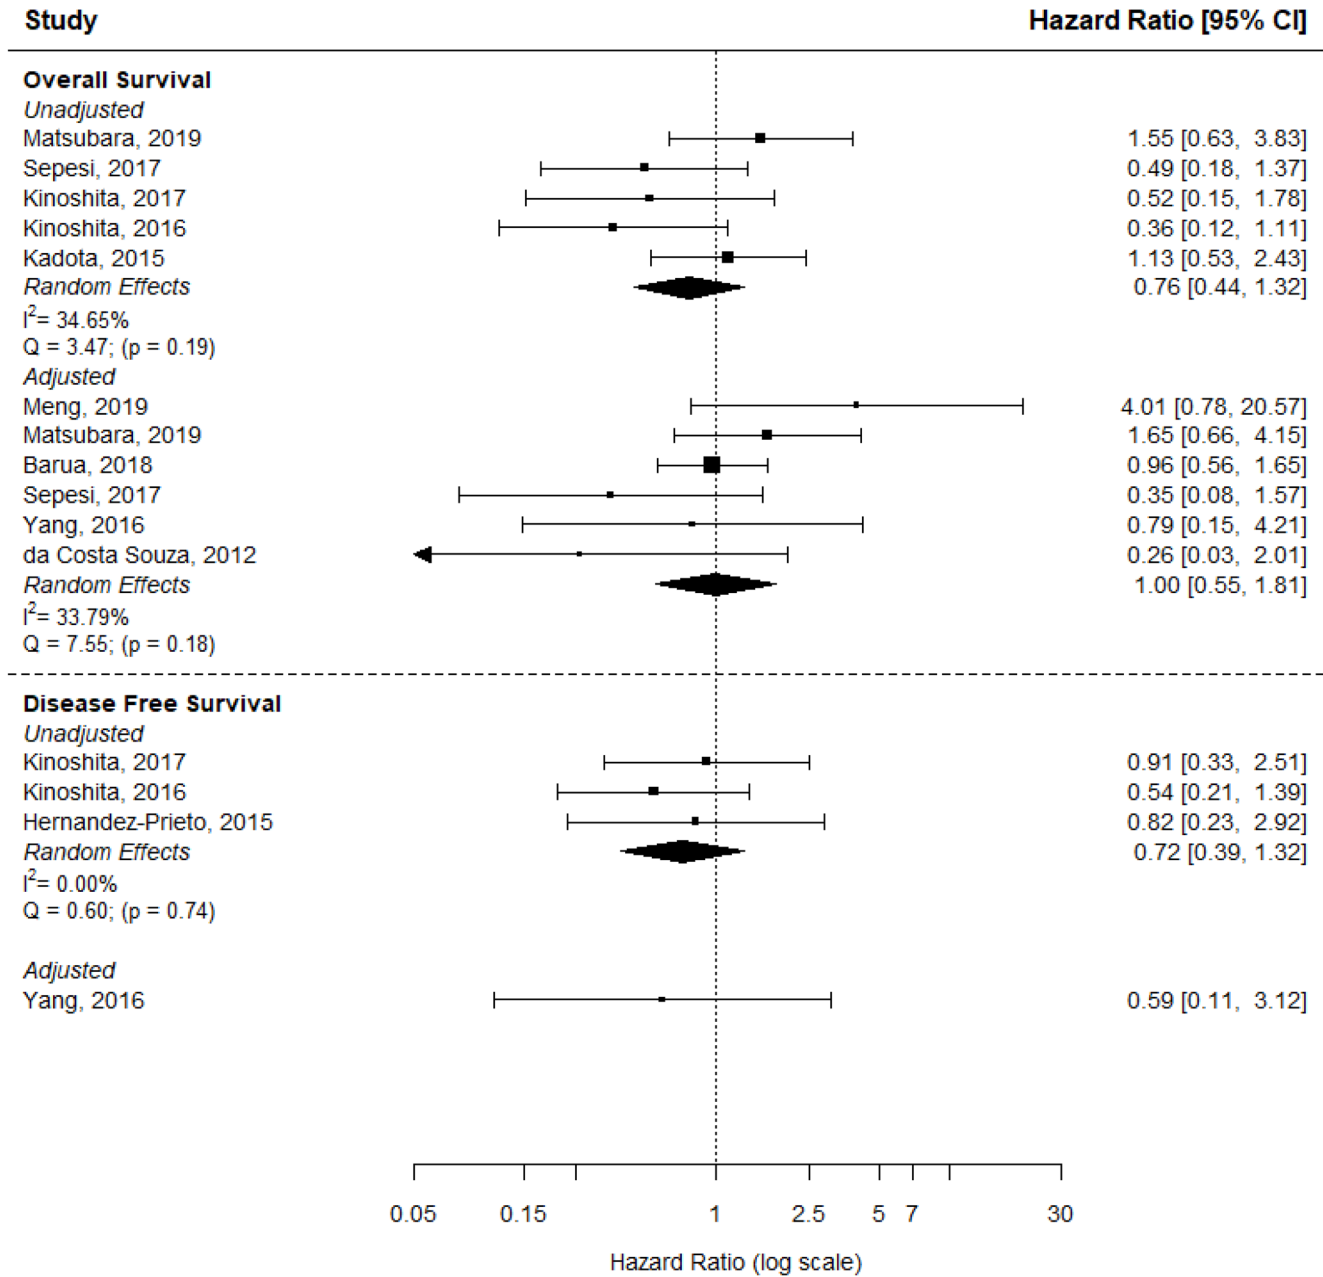

**B****CD4\_unadjusted\_os**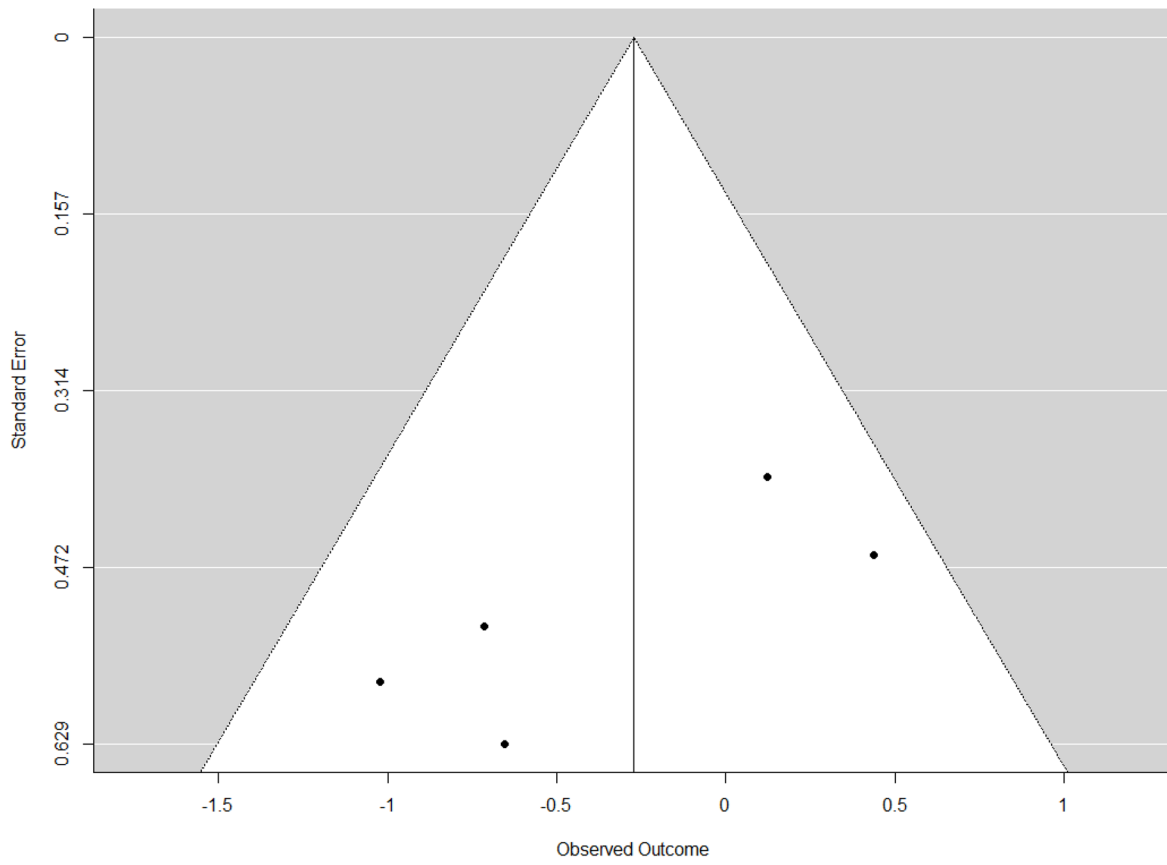**C****CD4\_adjusted\_os**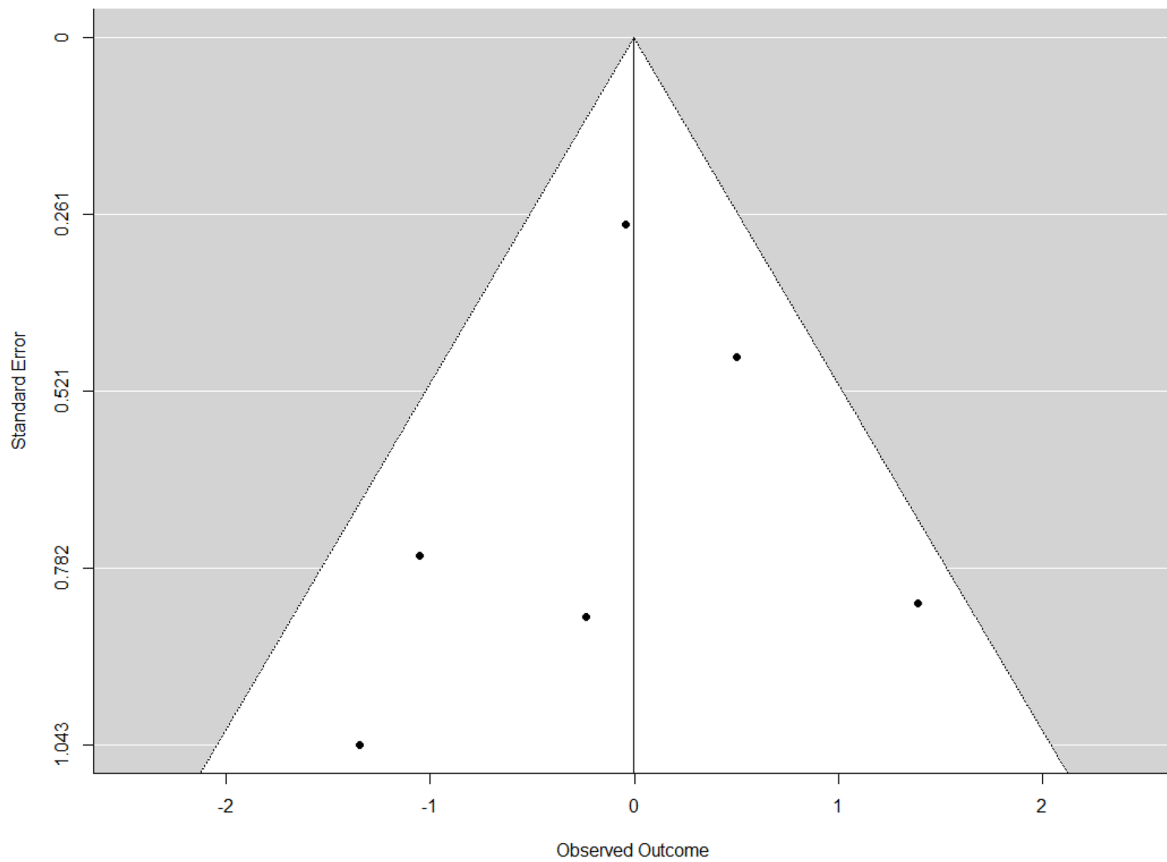

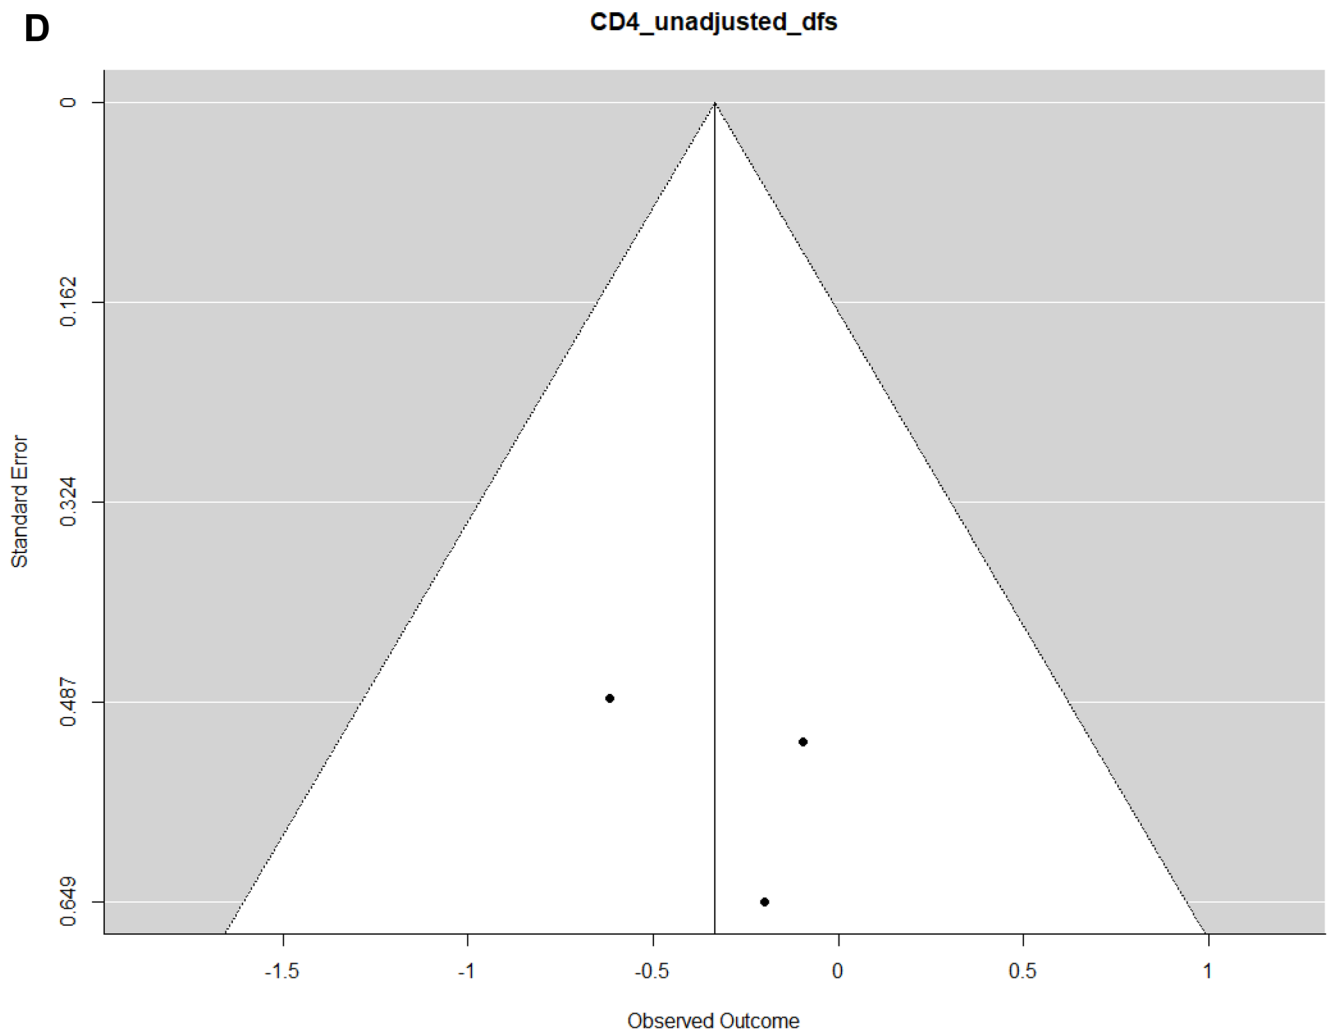

**Supplementary Figure 2:** (A) Forest Plot of CD4+ T Helper cells. (B) Funnel Plot of CD4+ T Helper cells Unadjusted OS Studies. (C) Funnel Plot of CD4+ T Helper cells Adjusted OS Studies. (D) Funnel Plot of CD4+ T Helper cells Unadjusted DFS Studies.

**A**

**CD8+ T cytotoxic cells**

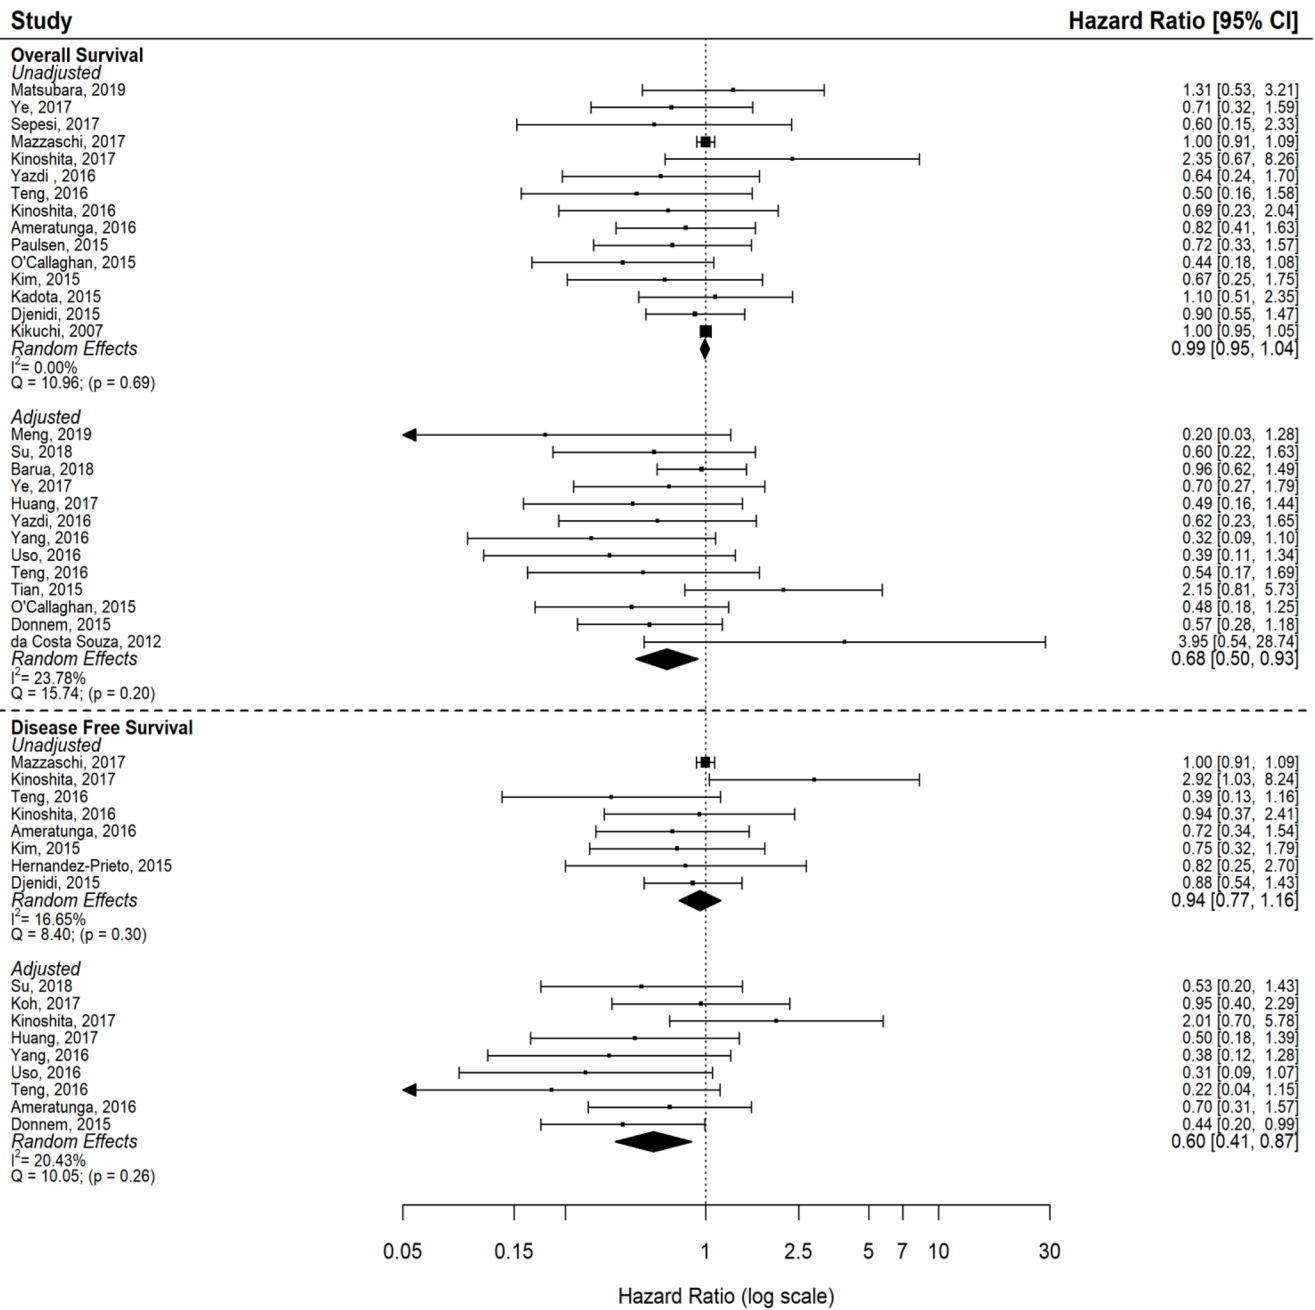



**B****CD8\_unadjusted\_os**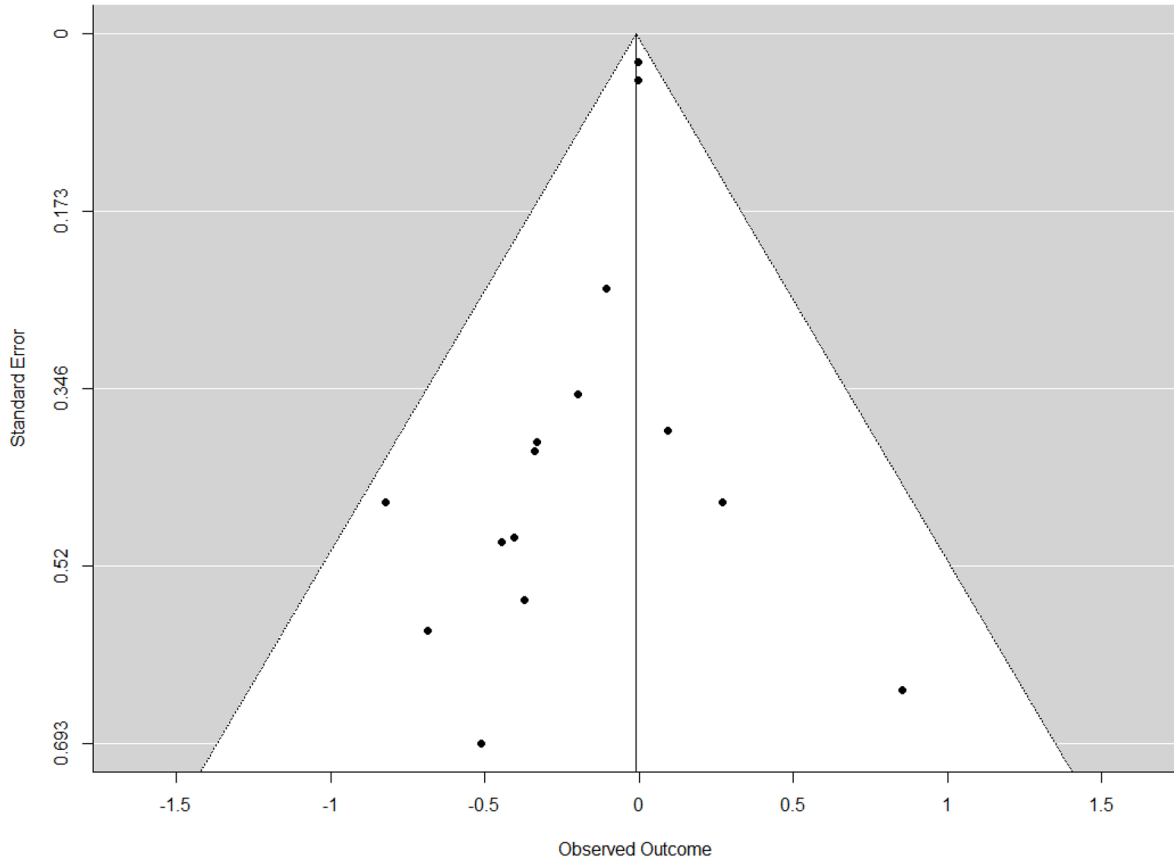**C****CD8\_adjusted\_os**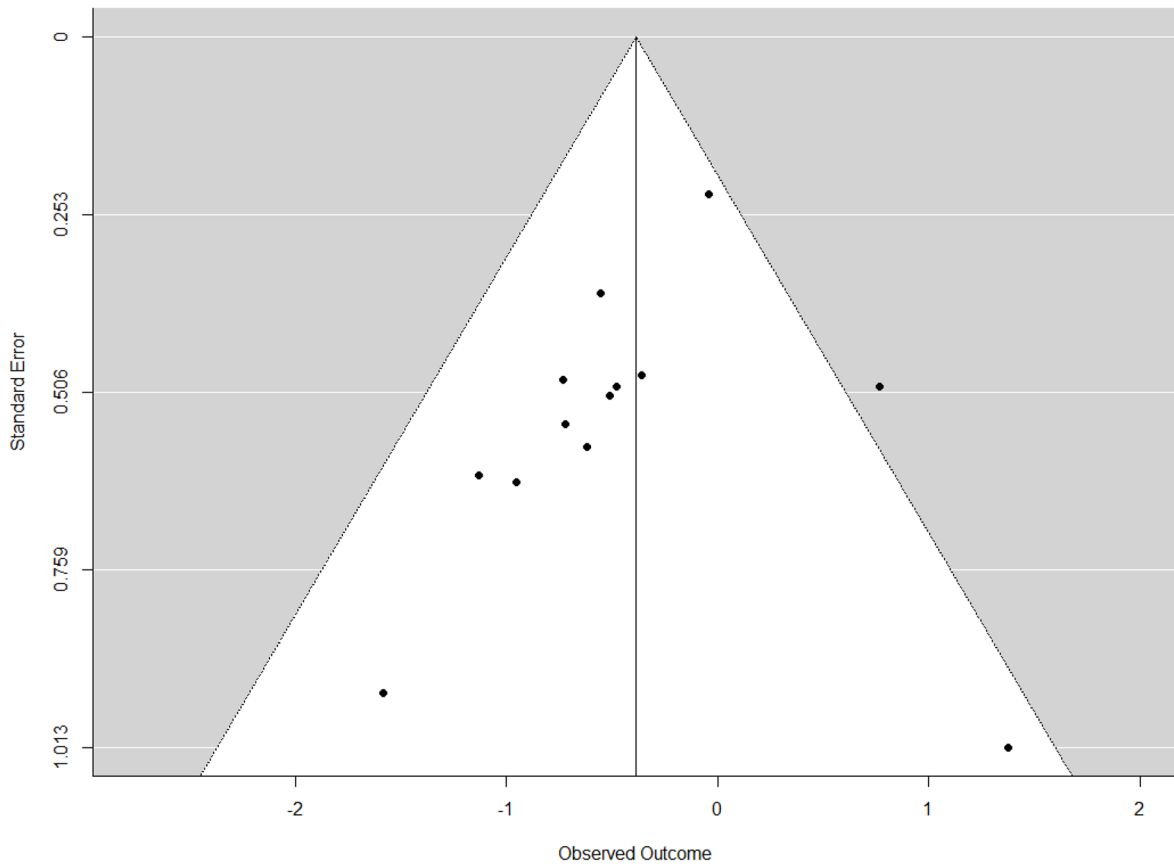

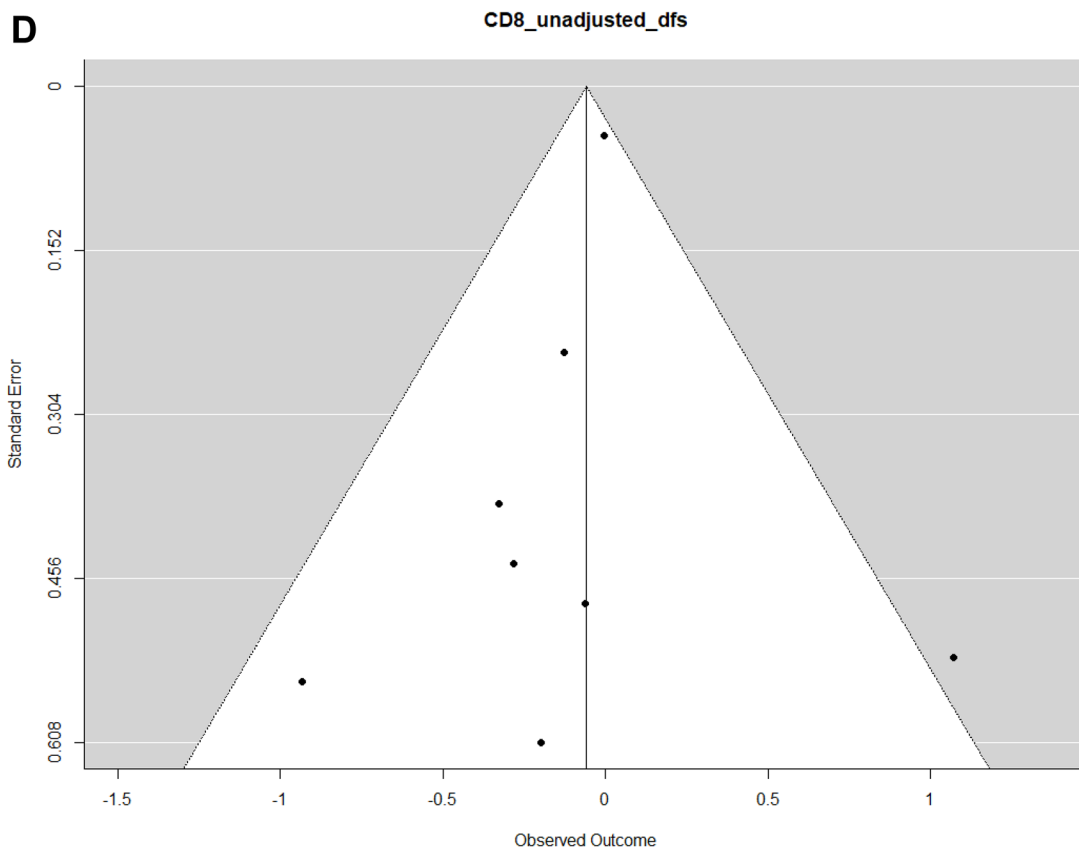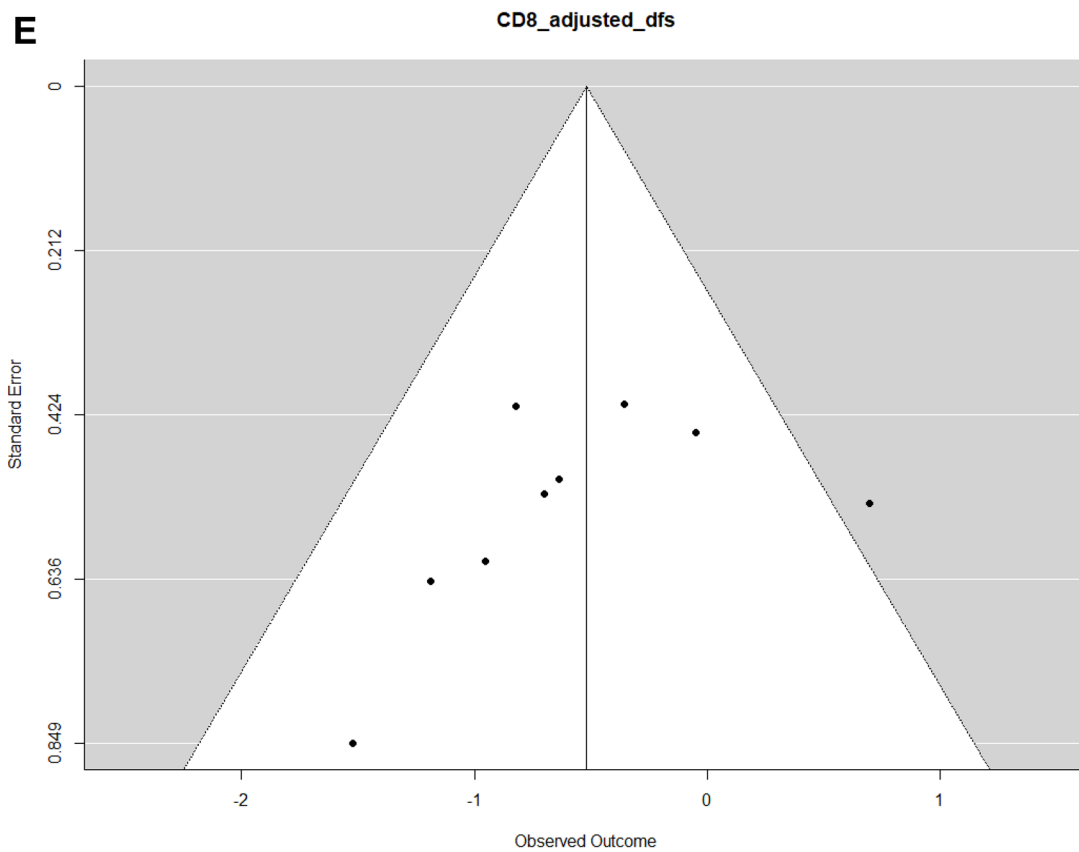

**Supplementary Figure 3:** (A) Forest Plot of CD8+ T cytotoxic cells. (B) Funnel Plot of CD8+ T cytotoxic cells Unadjusted OS Studies. (C) Funnel Plot of CD8+ T cytotoxic cells Adjusted OS Studies. (D) Funnel Plot of CD8+ T cytotoxic cells Unadjusted DFS Studies. (E) Funnel Plot of CD8+ T cytotoxic cells Adjusted DFS Studies.

A

### CD20+ B cells

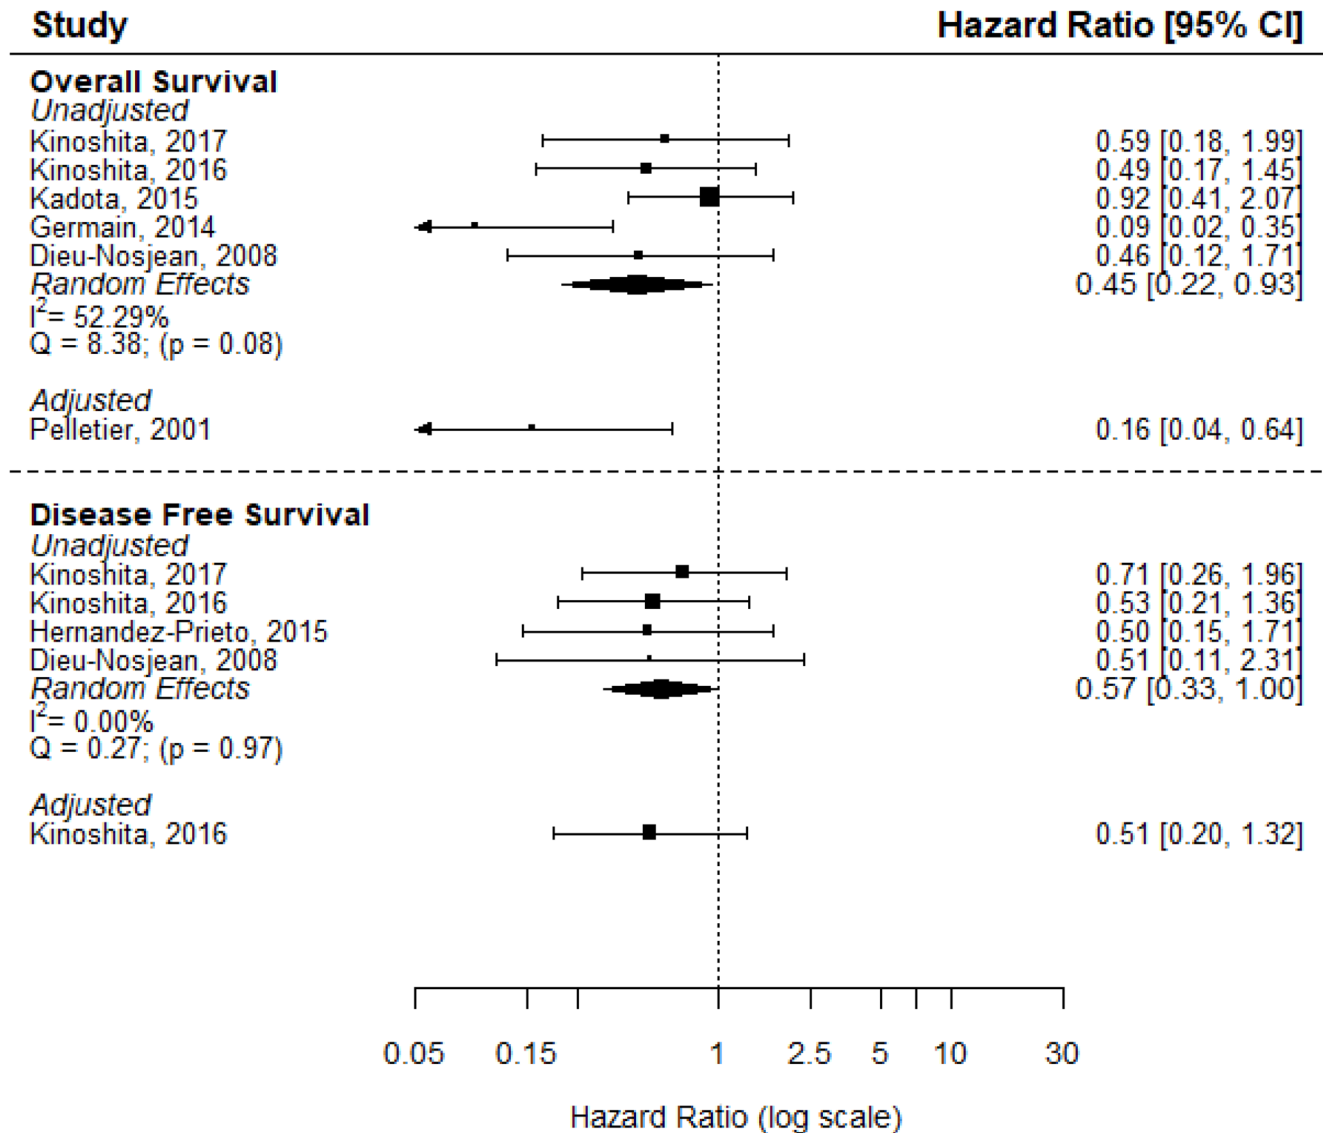

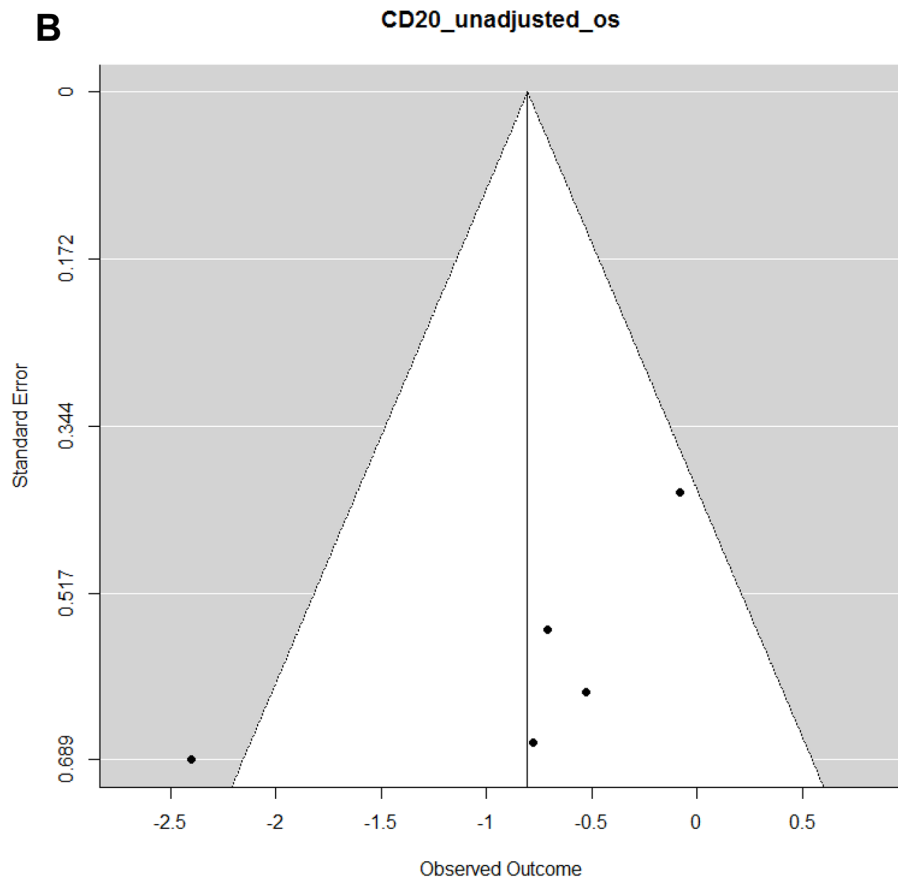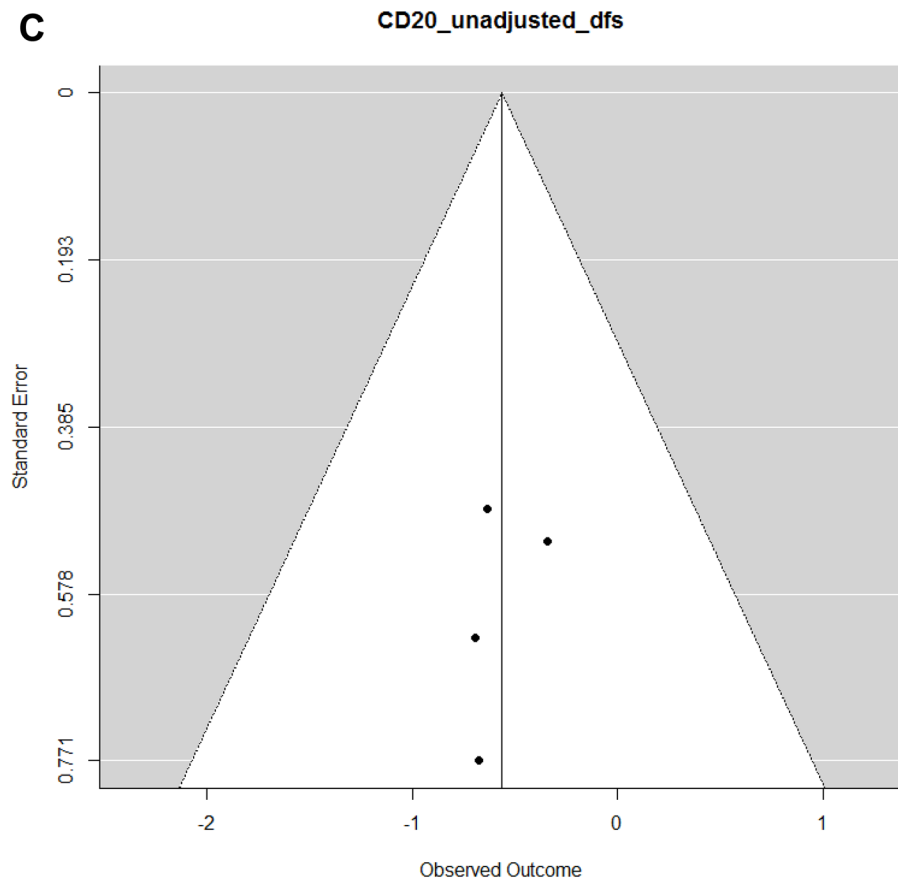

**Supplementary Figure 4:** (A) Forest Plot of CD20+ B cells. (B) Funnel Plot of CD20+ B cells Unadjusted OS Studies. (C) Funnel Plot of CD20+ B cells Unadjusted DFS Studies.

A

FoxP3+ T Regulatory cells

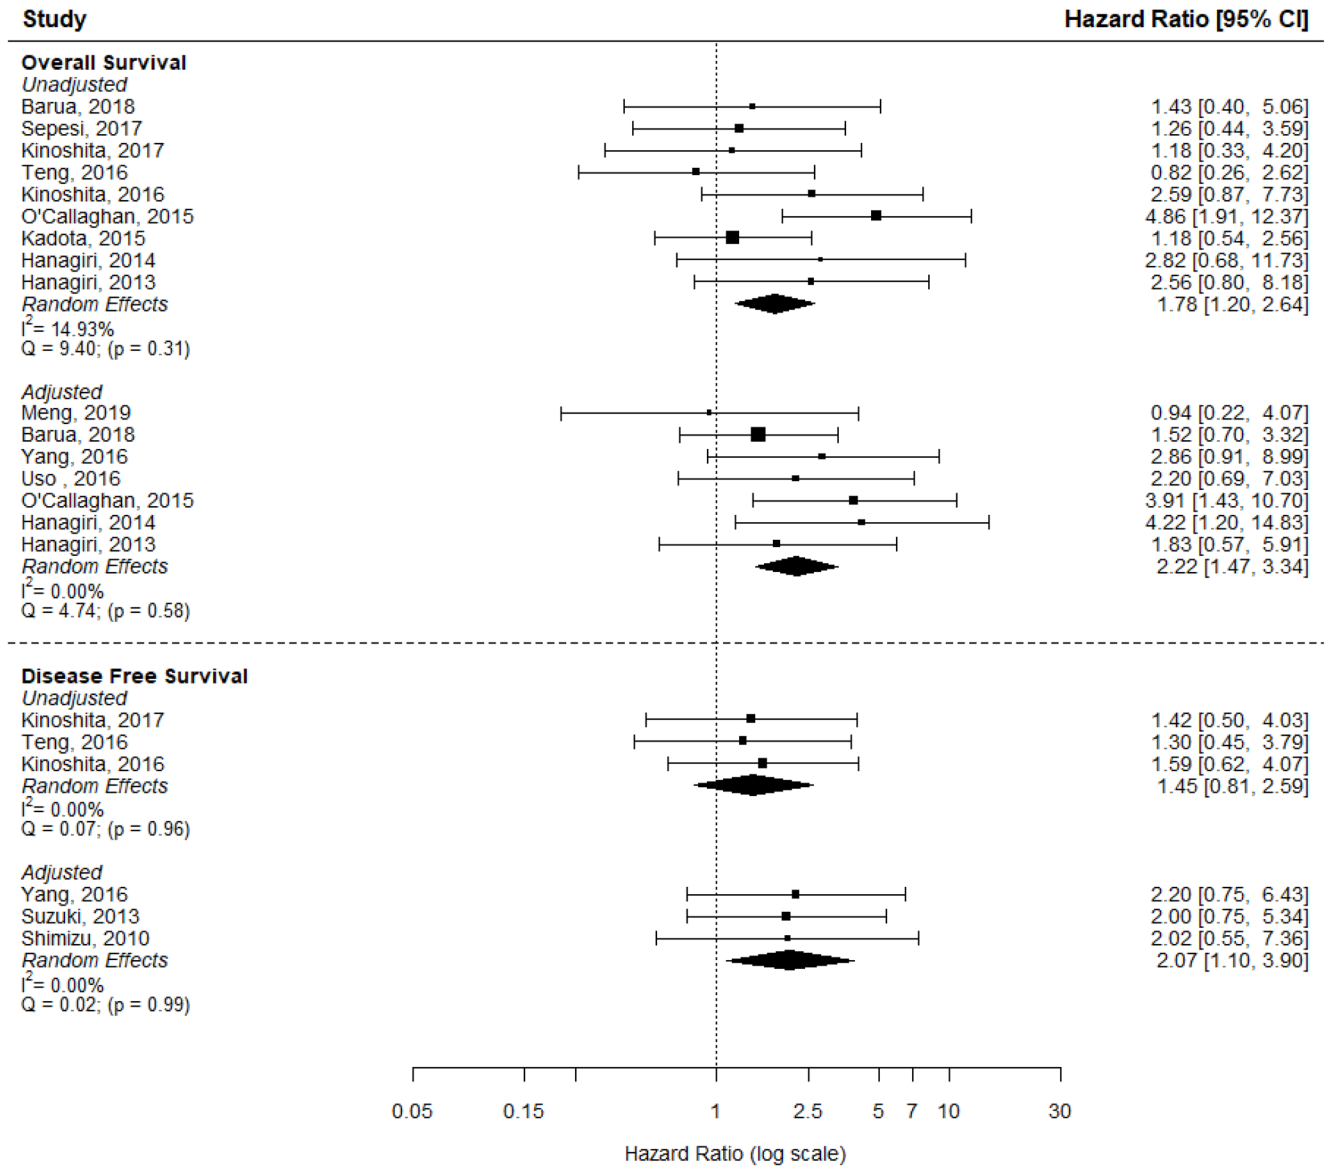

**B****FoxP3\_unadjusted\_os**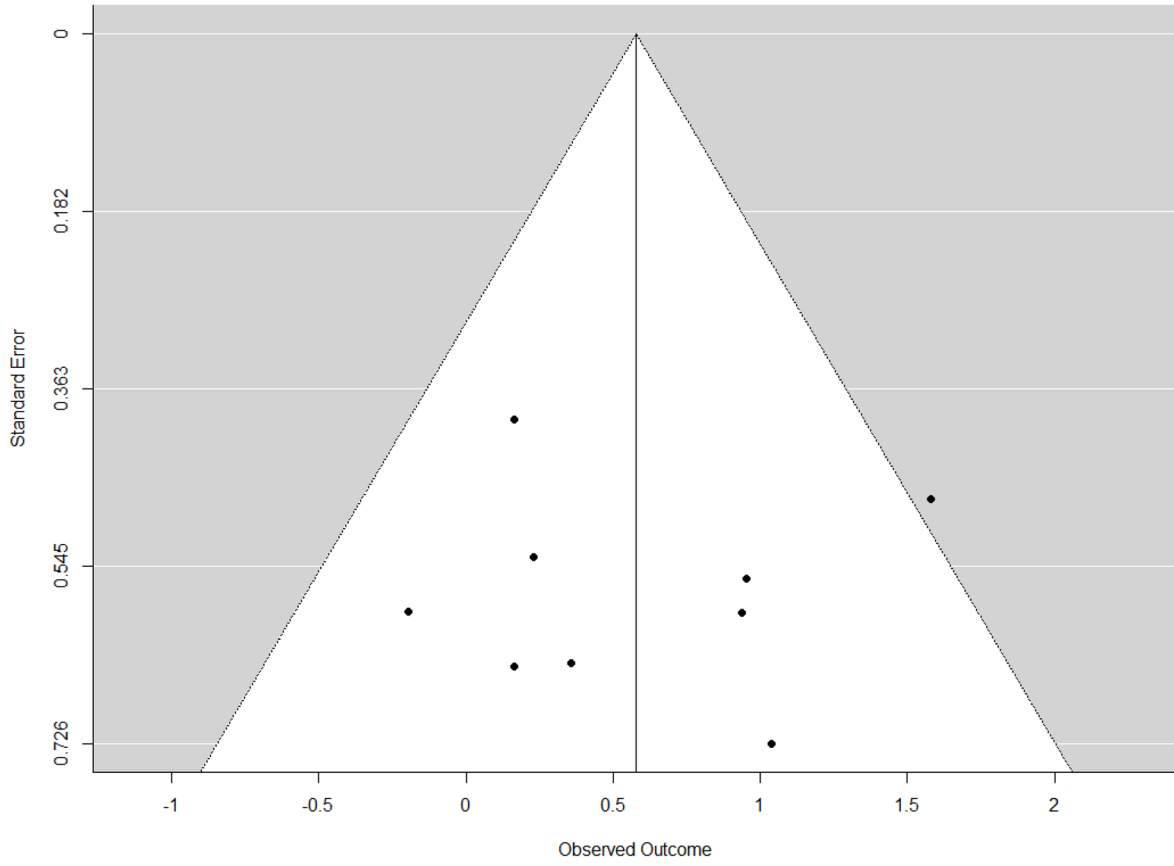**C****FoxP3\_adjusted\_os**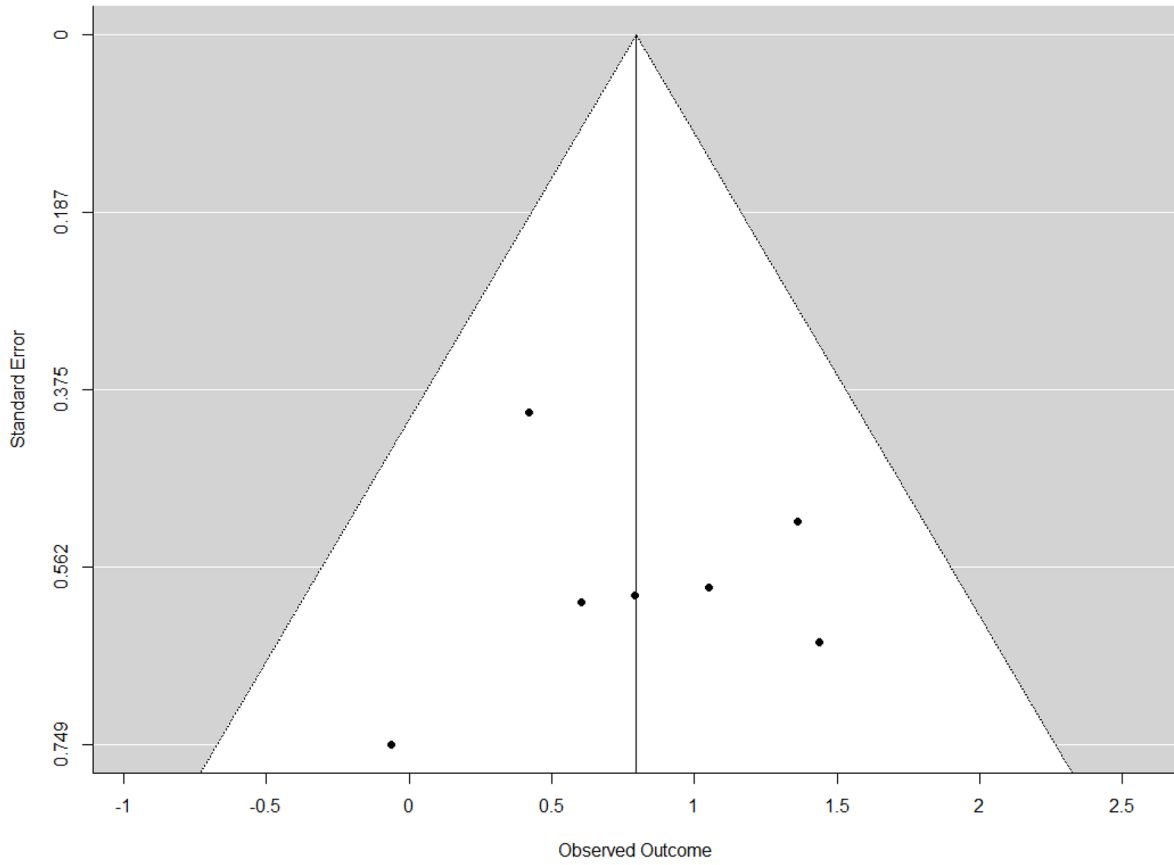

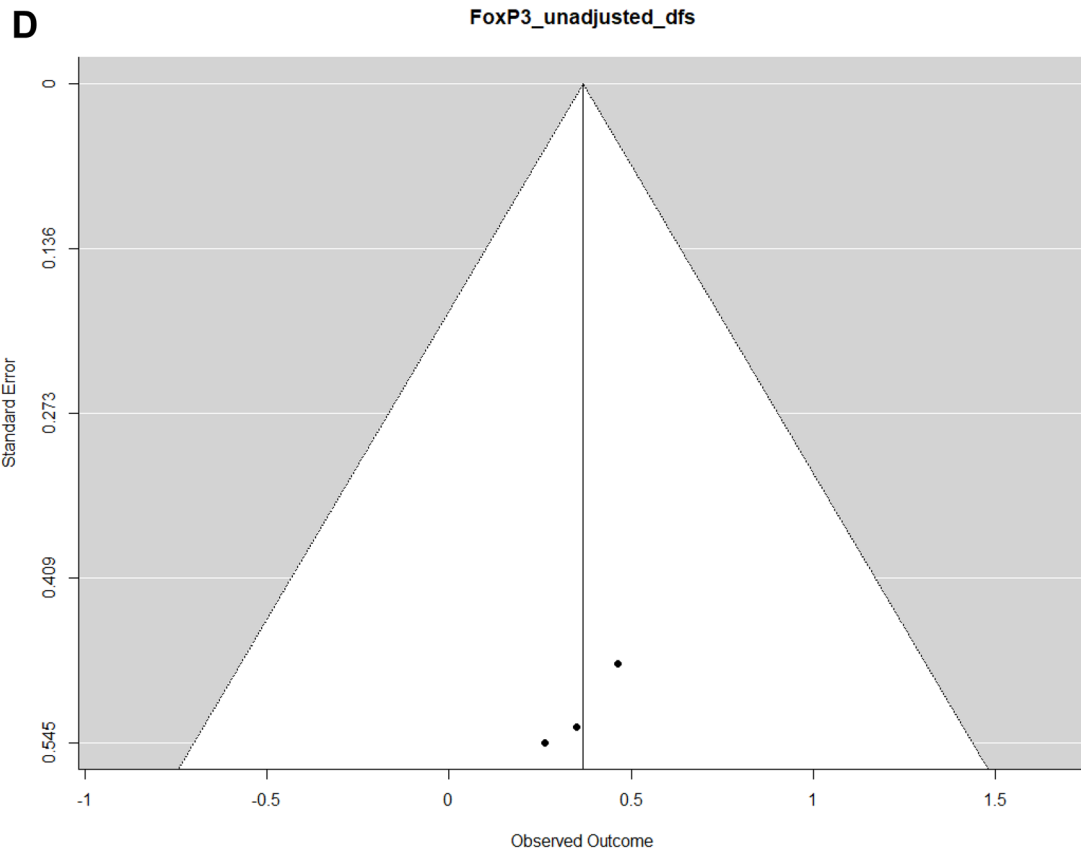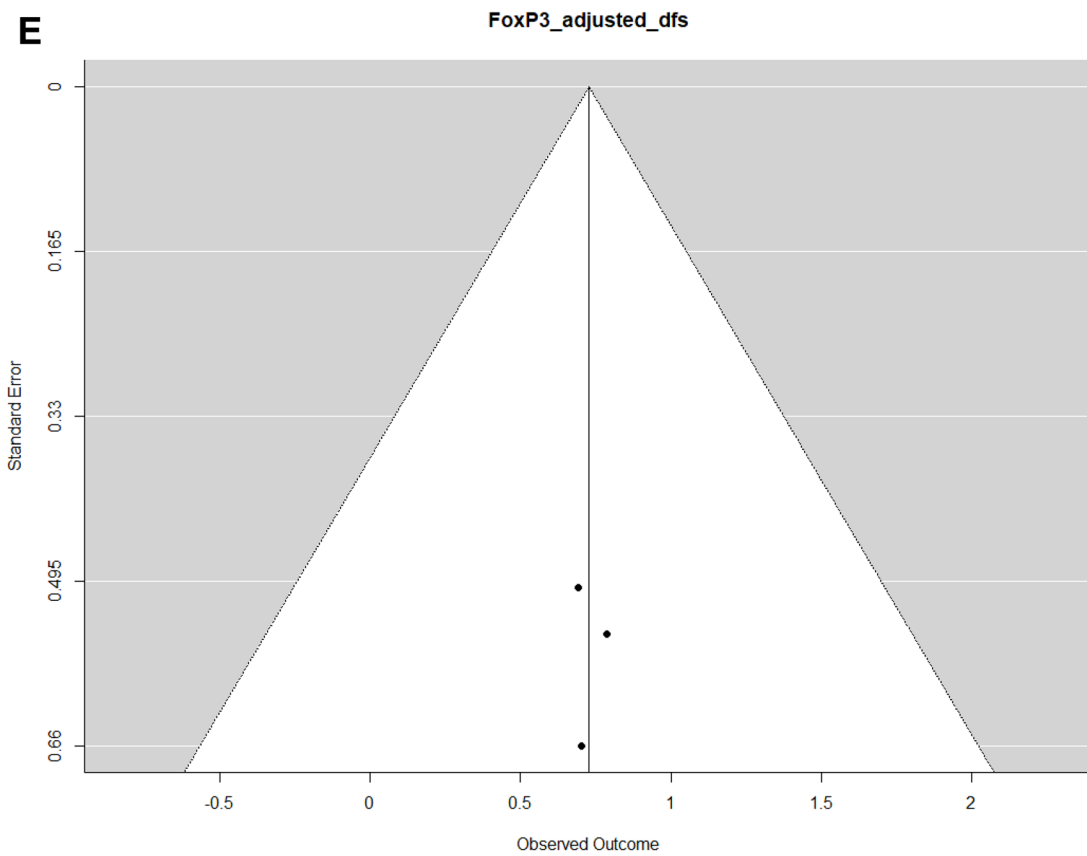

**Supplementary Figure 5:** (A) Forest Plot of FoxP3+T Regulatory cells. (B) Funnel Plot of FoxP3+T Regulatory cells Unadjusted OS Studies. (C) Funnel Plot of FoxP3+T Regulatory cells Adjusted OS Studies. (D) Funnel Plot of FoxP3+T Regulatory cells Unadjusted DFS Studies. (E) Funnel Plot of FoxP3+T Regulatory cells Adjusted DFS Studies.

A

## Natural Killer cells (CD56/CD57+)

Study

Hazard Ratio [95% CI]

**Overall Survival***Unadjusted*

Sepesi, 2017

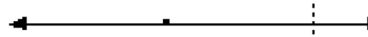

0.23 [0.03, 1.72]

Kikuchi, 2007

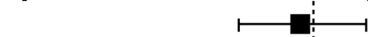

0.89 [0.48, 1.67]

Villegas, 2002

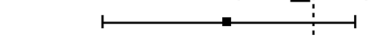

0.43 [0.12, 1.50]

*Random Effects*

0.66 [0.35, 1.25]

 $I^2 = 13.63\%$ 

Q = 2.32; (p = 0.31)

*Adjusted*

Sepesi, 2017

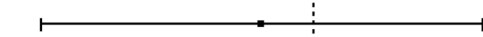

0.60 [0.07, 5.33]

Huang, 2017

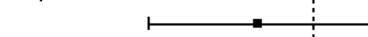

0.58 [0.19, 1.74]

Parra, 2016

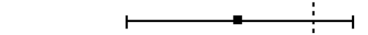

0.48 [0.16, 1.46]

Villegas, 2002

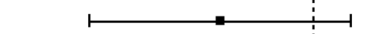

0.40 [0.11, 1.45]

*Random Effects*

0.50 [0.26, 0.95]

 $I^2 = 0.00\%$ 

Q = 0.22; (p = 0.97)

**Disease Free Survival***Unadjusted*

Hernandez-Prieto, 2015

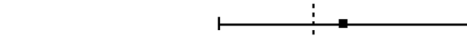

1.35 [0.39, 4.66]

*Adjusted*

Huang, 2017

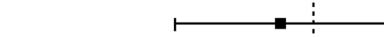

0.73 [0.26, 2.06]

Parra, 2016

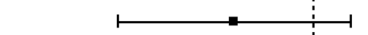

0.46 [0.14, 1.45]

*Random Effects*

0.59 [0.27, 1.28]

 $I^2 = 0.00\%$ 

Q = 0.34; (p = 0.56)

0.05 0.15 1 2.5 5 10 30

Hazard Ratio (log scale)



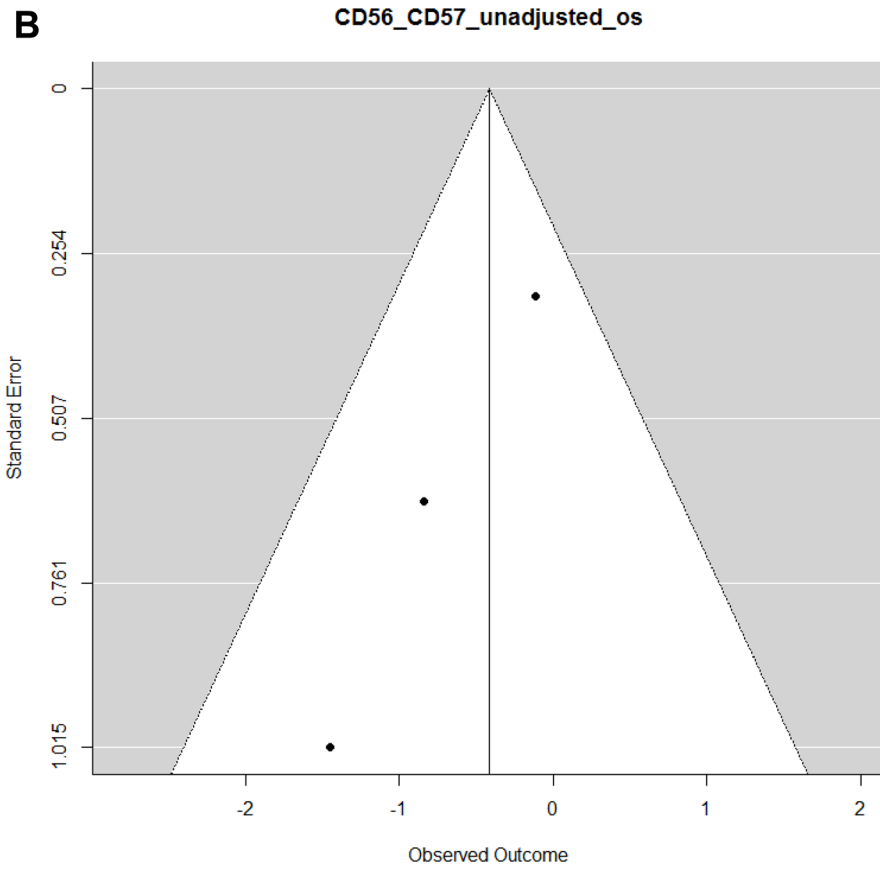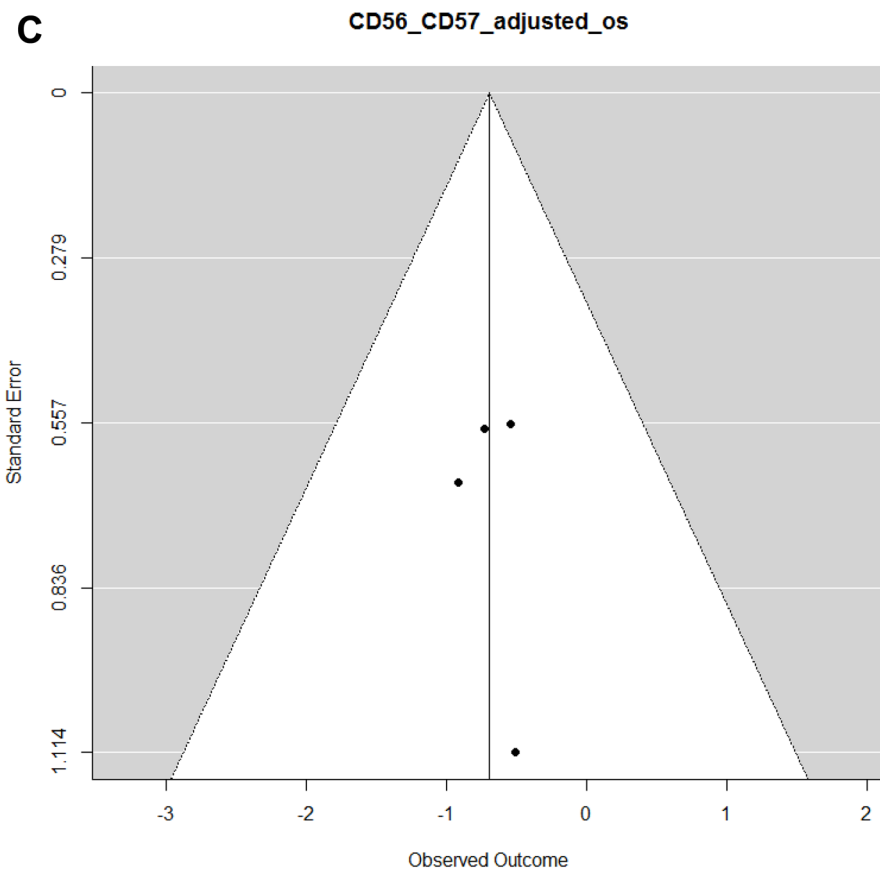

**Supplementary Figure 6:** (A) Forest Plot of NK cells (CD56/CD57+). (B) Funnel Plot of NK cells (CD56/CD57+) Unadjusted OS Studies. (C) Funnel Plot of NK cells (CD56/CD57+) Adjusted OS Studies.

**A**

**Macrophages (CD68+)**

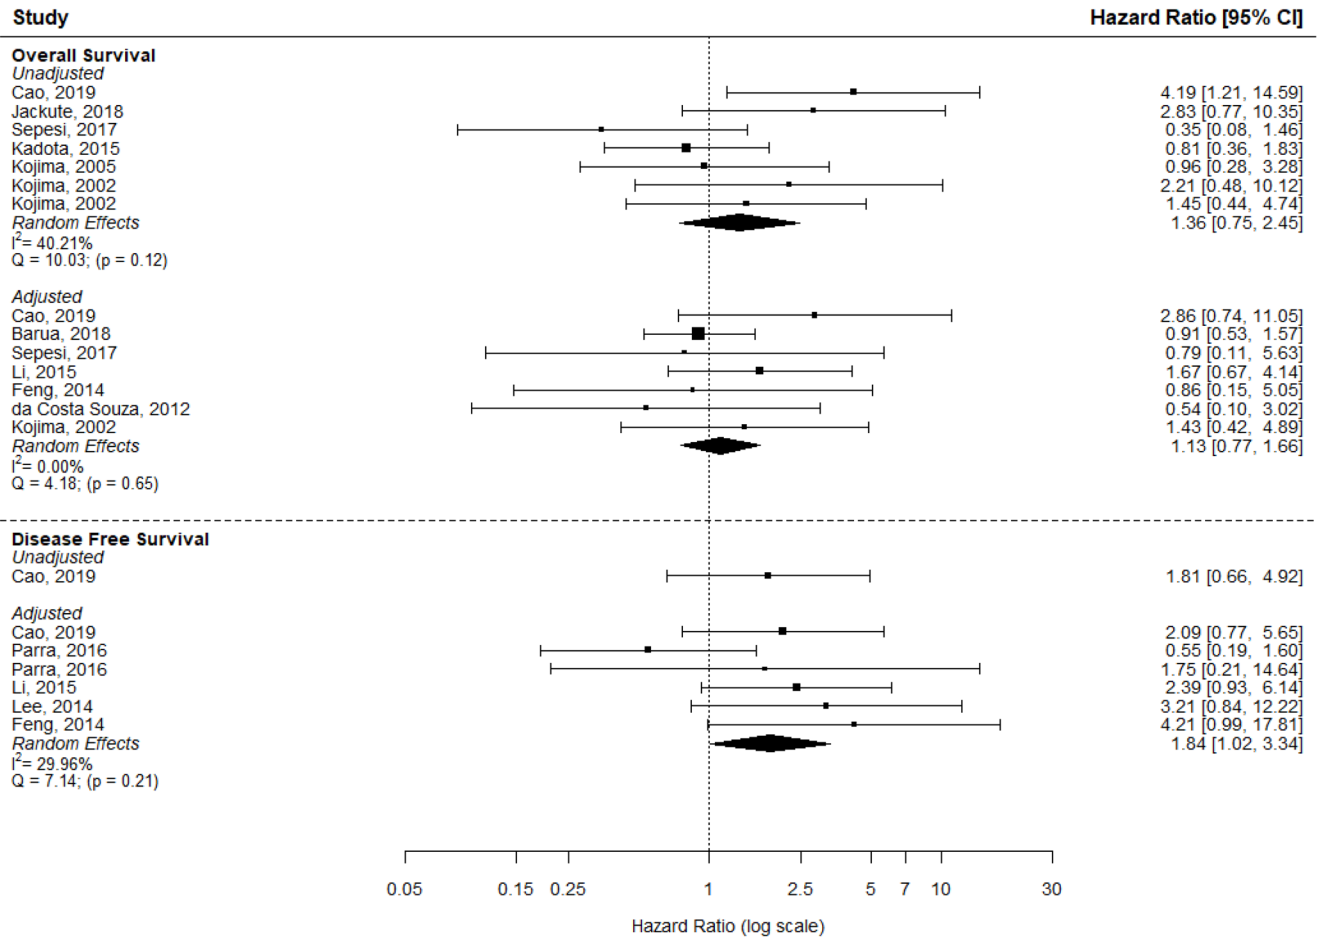

**B****CD68\_unadjusted\_os**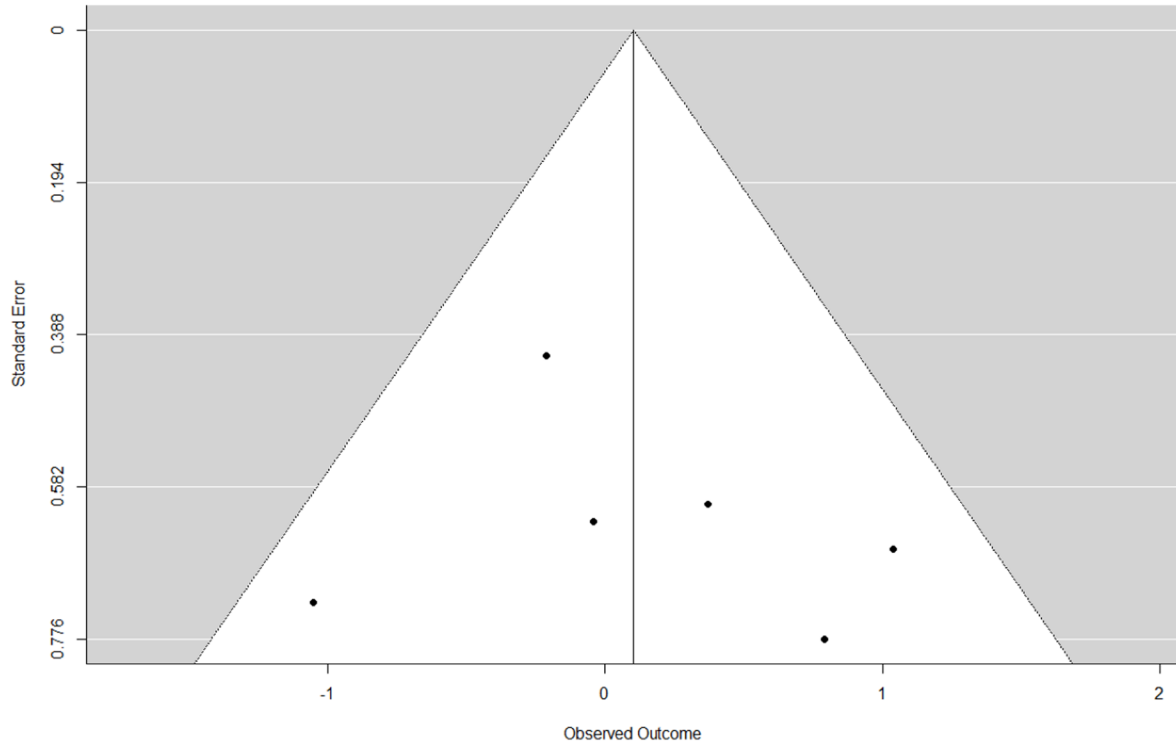**C****CD68\_adjusted\_os**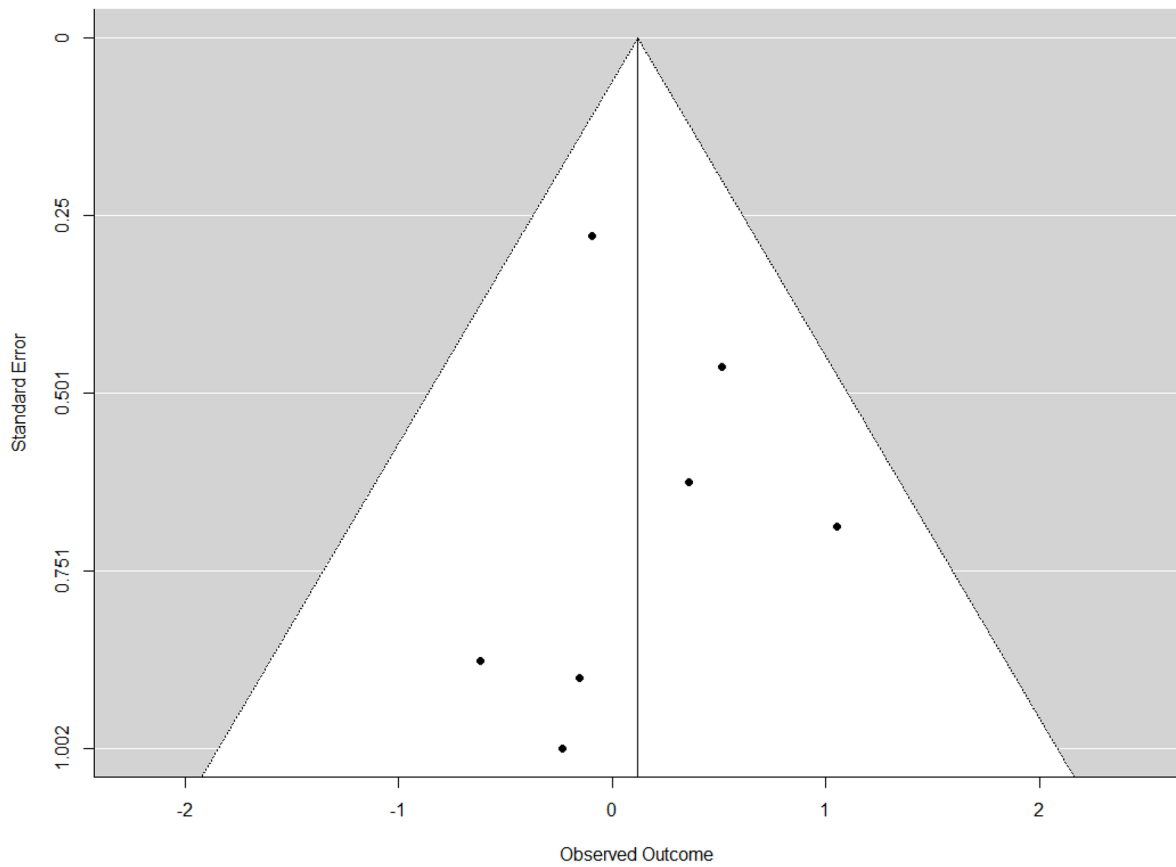

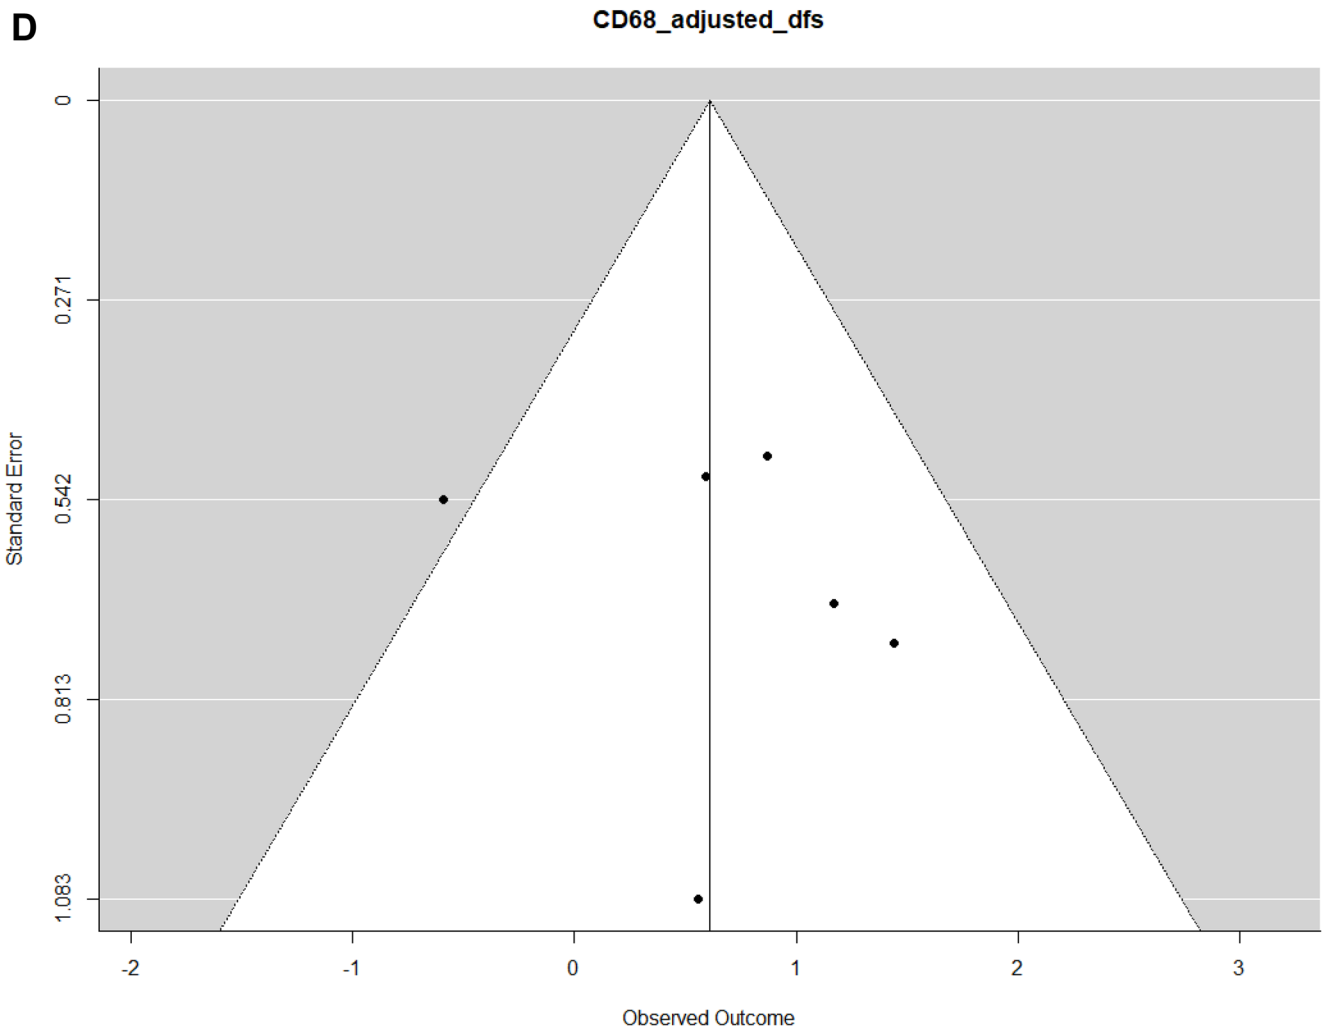

**Supplementary Figure 7:** (A) Forest Plot of macrophages (CD68+). (B) Funnel Plot of macrophages (CD68+) Unadjusted OS Studies. (C) Funnel Plot of macrophages (CD68+) Adjusted OS Studies. (D) Funnel Plot of macrophages (CD68+) Adjusted DFS Studies.

A

## Mast Cells

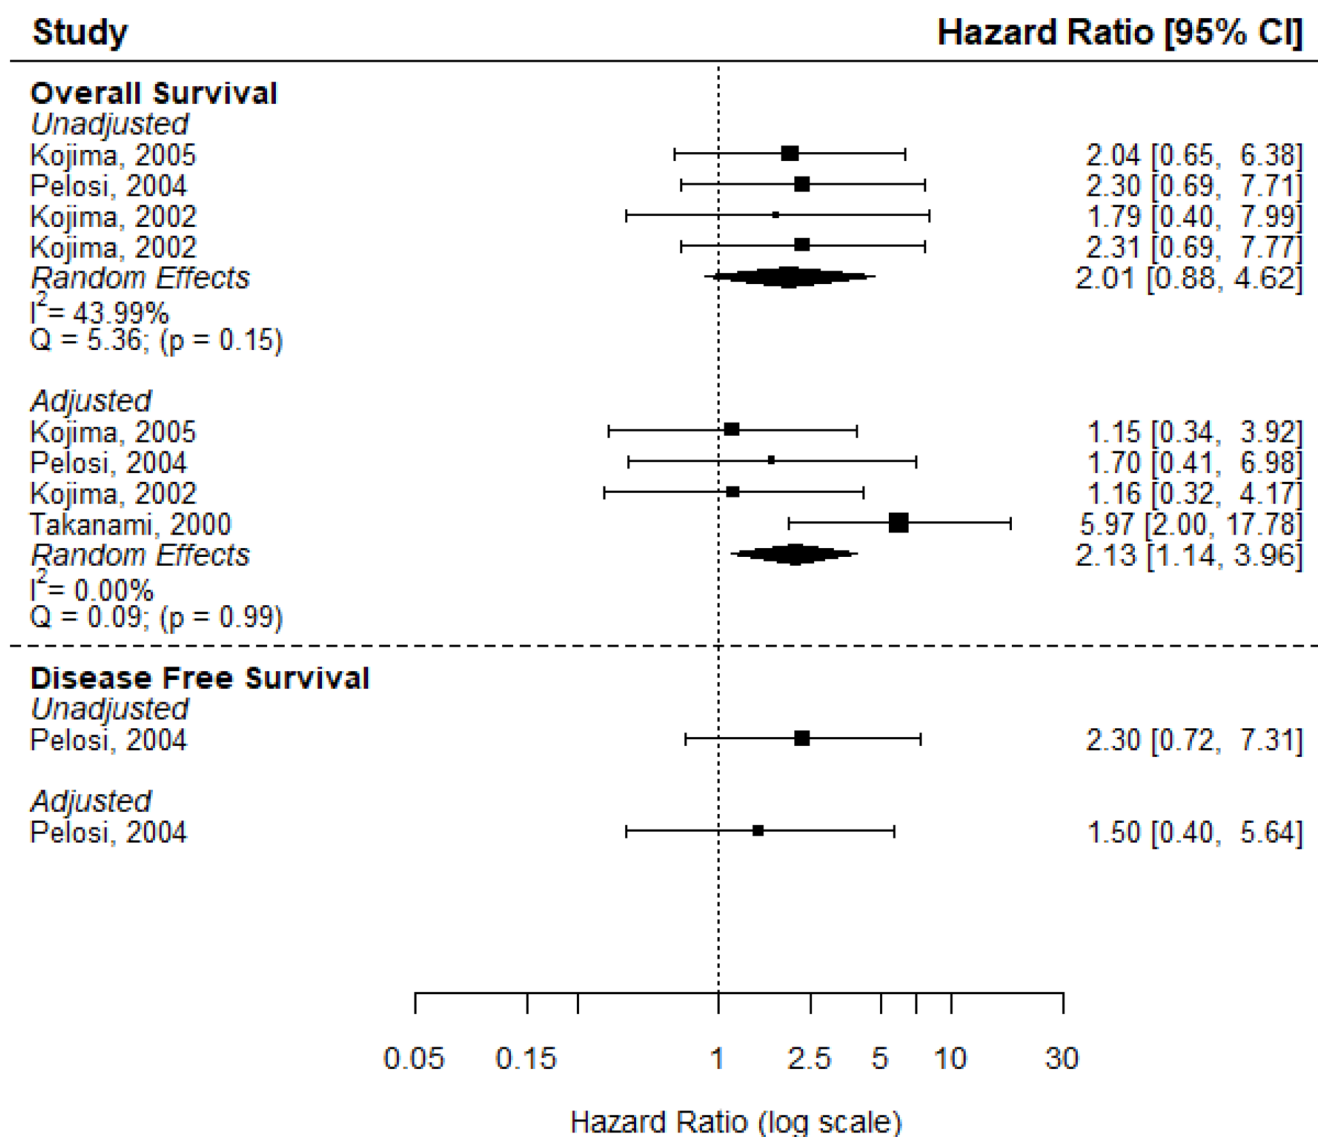

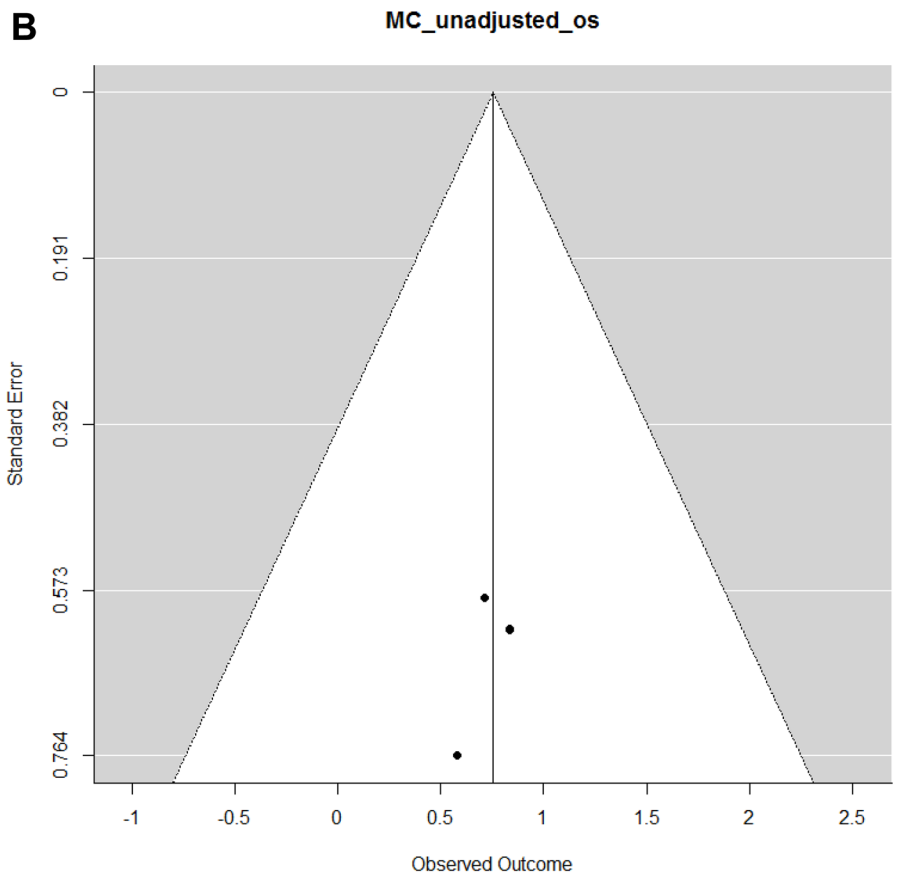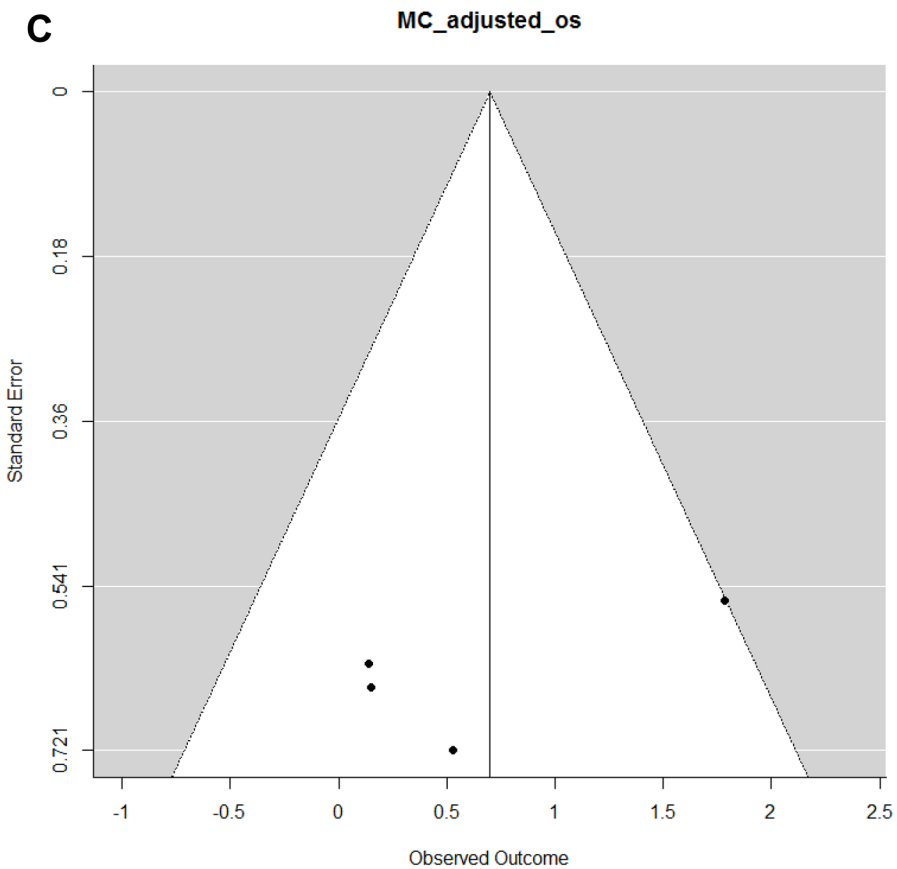

**Supplementary Figure 8:** (A) Forest Plot of MCs. (B) Funnel Plot of MCs Unadjusted OS Studies. (C) Funnel Plot of MCs Adjusted OS Studies.
